## **An osmotic laxative renders mice susceptible to prolonged *Clostridioides difficile* colonization and hinders clearance**

Sarah Tomkovich<sup>1</sup>, Ana Taylor<sup>1</sup>, Jacob King<sup>1</sup>, Joanna Colovas<sup>1</sup>, Lucas Bishop<sup>1</sup>, Kathryn McBride<sup>1</sup>, Sonya Royzenblat<sup>1</sup>, Nicholas A. Lesniak<sup>1</sup>, Ingrid L. Bergin<sup>2</sup>, Patrick D. Schloss<sup>1†</sup>

† To whom correspondence should be addressed: [pschloss@umich.edu](mailto:pschloss@umich.edu)

1. Department of Microbiology and Immunology, University of Michigan, Ann Arbor, MI, USA

2. The Unit for Laboratory Animal Medicine, University of Michigan, Ann Arbor, MI, USA

## 1 **Abstract**

2 Antibiotics are a major risk factor for *Clostridioides difficile* infections (CDIs) because of their  
3 impact on the microbiota. However, non-antibiotic medications such as the ubiquitous osmotic  
4 laxative polyethylene glycol (PEG) 3350 also alter the microbiota. Clinicians also hypothesize  
5 that PEG helps clear *C. difficile*. But whether PEG impacts CDI susceptibility and clearance is  
6 unclear. To examine how PEG impacts susceptibility, we treated C57Bl/6 mice with 5-day and  
7 1-day doses of 15% PEG in the drinking water and then challenged the mice with *C. difficile*  
8 630. We used clindamycin-treated mice as a control because they consistently clear *C. difficile*  
9 within 10 days post-challenge. PEG treatment alone was sufficient to render mice susceptible  
10 and 5-day PEG-treated mice remained colonized for up to 30 days post-challenge. In contrast,  
11 1-day PEG treated mice were transiently colonized, clearing *C. difficile* within 7 days post-challenge.  
12 To examine how PEG treatment impacts clearance, we administered a 1-day PEG treatment  
13 to clindamycin-treated, *C. difficile*-challenged mice. Administering PEG to mice after *C. difficile*  
14 challenge prolonged colonization up to 30 days post-challenge. When we trained a random  
15 forest model with community data from 5 days post-challenge, we were able to predict which  
16 mice would exhibit prolonged colonization (AUROC = 0.90). Examining the dynamics of these  
17 bacterial populations during the post-challenge period revealed patterns in the relative abundances  
18 of *Bacteroides*, *Enterobacteriaceae*, *Porphyromonadaceae*, *Lachnospiraceae*, and *Akkermansia*  
19 that were associated with prolonged *C. difficile* colonization in PEG-treated mice. Thus, the osmotic  
20 laxative, PEG, rendered mice susceptible to *C. difficile* colonization and hindered clearance.

## 21 **Importance**

22 Diarrheal samples from patients taking laxatives are typically rejected for *Clostridioides difficile*  
23 testing. However, there are similarities between the bacterial communities from people with diarrhea  
24 or *C. difficile* infections (CDI) including lower diversity compared to communities from healthy  
25 patients. This observation led us to hypothesize that diarrhea may be an indicator of *C. difficile*  
26 susceptibility. We explored how osmotic laxatives disrupt the microbiota's colonization resistance to  
27 *C. difficile* by administering a laxative to mice either before or after *C. difficile* challenge. Our findings  
28 suggest that osmotic laxatives disrupt colonization resistance to *C. difficile*, and prevent clearance

29 among mice already colonized with *C. difficile*. Considering that most hospitals recommend not  
30 performing *C. difficile* testing on patients taking laxatives and laxatives are prescribed prior to  
31 administering fecal microbiota transplants via colonoscopy to patients with recurrent CDIs, further  
32 studies are needed to evaluate if laxatives impact microbiota colonization resistance in humans.

### 33 Introduction

34 Antibiotics are a major risk factor for *Clostridioides difficile* infections (CDIs) because they disrupt  
35 microbiota colonization resistance (1). However, antibiotics are not the only types of medications  
36 that disrupt the microbiota (2–4). Although, other medications (proton pump inhibitors, osmotic  
37 laxatives, antimotility agents, and opioids) have been implicated as risk or protective factors for CDIs  
38 through epidemiological studies, whether the association is due to their impact on the microbiota is  
39 still unclear (5–9).

40 Many of the non-antibiotic medications associated with CDIs are known to modulate gastrointestinal  
41 motility leading to either increased or decreased colonic transit time, which in turn also strongly  
42 impacts microbiota composition and function (10, 11). Stool consistency often serves as an  
43 approximation of intestinal motility (10). Our group has shown that when *C. difficile* negative  
44 samples from patients were separated into two groups based on stool consistency, there were  
45 similar microbiota features between samples from CDI patients and *C. difficile* negative patients  
46 with diarrhea compared to non-diarrheal samples that were *C. difficile* negative (12). The similar  
47 community features between CDI patients and patients with diarrhea included low alpha diversity  
48 and only 6 bacterial taxa with higher relative abundances in communities from CDI patients. These  
49 results led to the hypothesis that bacterial communities from patients experiencing diarrhea are  
50 susceptible to developing CDIs, regardless of how they developed diarrhea.

51 Depending on the dose administered, osmotic laxatives can lead to diarrhea and temporarily disrupt  
52 the human intestinal microbiota (13). The ubiquitous osmotic laxative, polyethylene glycol (PEG)  
53 3350 is found in Miralax, Nulytely, and Golytely and is also commonly used as bowel preparation  
54 for colonoscopies. Interestingly, previous studies have shown that treating mice with PEG alone  
55 altered microbiota composition, reduced acetate and butyrate production, altered the mucus barrier,  
56 and rendered the mice susceptible to *C. difficile* colonization (14–17). The mucus barrier is thought  
57 to mediate protection from CDIs by protecting intestinal epithelial cells from the toxins produced by  
58 *C. difficile* (18, 19). Whether laxative administration results in more severe CDIs in mice and how  
59 long mice remain colonized with *C. difficile* after challenge is unclear.

60 Beyond susceptibility, PEG is also relevant in the context of treating recurrent CDIs via fecal

61 microbiota transplant (FMT), where a healthy microbiota is administered to the patient to restore  
62 colonization resistance. For FMTs that are delivered via colonoscopy, patients typically undergo  
63 bowel preparation by taking an osmotic laxative prior to the procedure. Many of the FMT studies to  
64 date rationalize the use of laxatives prior to the FMT (20–22) based on a 1996 case study with 2  
65 pediatric patients where the authors suggested in the discussion that the laxative may help flush *C.*  
66 *difficile* spores and toxins from the intestine (23).

67 Our group has used C57BL/6 mice to characterize how antibiotics disrupt the microbiota and  
68 influence *C. difficile* susceptibility and clearance (24–26). Although two groups have now shown  
69 that PEG treatment alone renders mice susceptible to *C. difficile* (15, 17), these studies have raised  
70 additional questions regarding the dynamics and severity of infection as well as the role of laxative  
71 treatment in *C. difficile* clearance. Here, we characterized how long PEG-treated mice remain  
72 susceptible, whether PEG treatment results in more sustained *C. difficile* colonization and severe  
73 CDI than mice treated with clindamycin, and whether PEG treatment after challenge can promote  
74 *C. difficile* clearance. Addressing these questions will better inform how we think about laxatives  
75 and diarrhea in the context of CDIs.

## 76 **Results**

77 **5-day laxative treatment led to prolonged *C. difficile* colonization in mice.** Building off of  
78 previous work that showed treating mice with the osmotic laxative, PEG 3350, rendered mice  
79 susceptible to *C. difficile* colonization (15, 17), we decided to test how long *C. difficile* colonization  
80 is sustained and how long PEG-treated mice remain susceptible to *C. difficile*. We compared  
81 three groups of mice treated with PEG 3350 to one group of mice treated with our standard 10  
82 mg/kg clindamycin treatment, which temporarily renders mice susceptible to *C. difficile* colonization,  
83 with mice typically clearing *C. difficile* within 10 days post-challenge (9, 26). All three groups of  
84 PEG-treated mice were administered a 15% PEG solution in the drinking water for 5-days. The  
85 first group received no additional treatment. The second group was also treated with clindamycin.  
86 A third group was allowed to recover for 10 days prior to challenge (Fig. 1A). The PEG treatment  
87 resulted in weight loss for the 3 groups of mice, with the greatest change in weight observed on  
88 the fifth day of the PEG treatment. The mice recovered most of the lost weight by five days after

89 treatment (Fig. 1B). After either the PEG, clindamycin, or PEG and clindamycin treatment all mice  
90 were challenged with  $10^5$  *C. difficile* 630 spores (Fig. 1A). All treatments rendered mice susceptible  
91 to *C. difficile* colonization. In contrast to the mice that only received clindamycin, PEG-treated  
92 mice remained colonized with *C. difficile* at a high level through thirty days post-challenge (Fig.  
93 1C). The clindamycin-treated mice cleared *C. difficile* within ten days post-challenge (Fig. 1C).  
94 It was noteworthy that PEG-treated mice were still susceptible to *C. difficile* colonization after a  
95 10-day recovery period, although *C. difficile* was not detectable in most of the group in the initial  
96 five days post-challenge (Fig. 1C, S1A). One mouse was found dead on the 6th day post-challenge,  
97 presumably due to *C. difficile* as the bacterium became detectable in stool samples from that mouse  
98 on the 4th day post-challenge (Fig. S1A, mouse 10). From 8 days post-challenge onward, the  
99 density of *C. difficile* stabilized in the 10-day recovery group and remained high through 20-30  
100 days post-challenge (Fig. 1C). Thus, osmotic laxative treatment alone was sufficient to render  
101 mice susceptible to prolonged *C. difficile* colonization and PEG-treated mice remained susceptible  
102 through ten days post-treatment.

103 **5-day laxative treatment differentially disrupted the fecal microbiota compared to**  
104 **clindamycin treatment.** Since osmotic laxatives and clindamycin have previously been  
105 shown to disrupt the murine microbiota (14–17), we hypothesized the different *C. difficile*  
106 colonization dynamics between mice treated with the osmotic laxative or clindamycin were due to  
107 the two drugs having differential effects on the microbiota. We profiled the stool microbiota over  
108 time by sequencing the V4 region of the 16S rRNA gene to compare changes across treatment  
109 groups. We found time ( $R^2 = 0.29$ ) and treatment group ( $R^2 = 0.21$ ) explained half of the observed  
110 variation between fecal communities with most of the remaining variation explained by interactions  
111 between treatment group and other experimental variables including time, cage, and sequencing  
112 preparation plate (PERMANOVA combined  $R^2 = 0.95$ ,  $P < 0.001$ , Fig. 2A, Data Set S1, sheet  
113 1). None of the treatment groups recovered to their baseline community structure either 10 or 30  
114 days post-challenge, suggesting other community features besides recovery to baseline were  
115 responsible for the prolonged *C. difficile* colonization in PEG-treated mice (Fig. 2B).

116 Because time and treatment group influenced most of the variation between communities, we  
117 next explored whether there were differences in community diversity and composition between

118 treatment groups. We examined the alpha diversity dynamics by calculating the communities'  
119 Shannon diversity. Although both clindamycin and PEG treatments decreased diversity, the  
120 Shannon diversity was lower in the groups of mice that received PEG treatment compared to those  
121 that received clindamycin alone through thirty days post-challenge (Fig. 2C; Data Set S1, sheet 2).  
122 We next identified the bacterial genera whose relative abundances shifted after PEG treatment by  
123 comparing the baseline samples of mice treated with only PEG to samples from the same mice one  
124 day post-PEG-treatment. We found 18 genera whose relative abundances were altered by PEG  
125 treatment (Data Set S1, sheet 3). The majority of the bacterial relative abundances decreased after  
126 the PEG treatment, but the relative abundance among members of the *Enterobacteriaceae* and  
127 *Bacteroides* increased. The increase in *Bacteroides* relative abundance was unique to PEG treated  
128 mice, as the *Bacteroides* relative abundance actually decreased in clindamycin treated mice (Fig.  
129 2D). Finally, we identified the genera whose relative abundance differed across treatment groups  
130 over multiple time points. Of the 33 genera that were different between treatment groups, 24 genera  
131 were different over multiple time points (Fig. 2E, Data Set S1, sheet 4). Thus, PEG had a significant  
132 impact on the fecal microbiota that was maintained over time and was distinct from clindamycin  
133 treatment.

134 Because *C. difficile* was not immediately detectable in the stools of the PEG-treated mice that  
135 were allowed to recover for 10 days prior to challenge, we decided to examine if there were  
136 genera that changed during the post-challenge period. We compared the communities from when  
137 *C. difficile* shifted from undetectable at 1 day post-challenge to detectable in the stool samples  
138 with the density stabilizing around 8 days post-challenge (Fig. S1A). We found no genera with  
139 relative abundances that were significantly different over the two time points (Data Set S1, sheet 5).  
140 However, there was also wide variation between individual mice regarding when *C. difficile* became  
141 detectable (Fig. S1A) as well as the relative abundances of bacterial genera in the communities  
142 (Fig. S1B). For example, two mice had a high relative abundance of *Enterobacteriaceae* throughout  
143 the post-challenge period. One mouse died on the sixth day post-challenge and in the other, *C.*  
144 *difficile* was present at a high density from the 4th day post-challenge onward (Fig. S1B). While  
145 we did not identify a clear signal to explain the delayed appearance of *C. difficile* in the 5-day PEG  
146 mice that were allowed to recover for 10 days prior to challenge, the delay was striking and could

147 reflect changes in microbial activity or metabolites that were not examined in this study.

148 **5-day laxative treatment did not promote more severe CDIs despite altering the mucosal**  
149 **microbiota.** Given the findings from a previous study that demonstrated PEG treatment disrupts  
150 the mucus layer and alters the immune response in mice (16), we decided to examine the impact of  
151 PEG treatment on the mucosal microbiota and CDI severity. To evaluate the mucosal microbiota,  
152 we sequenced communities associated with tissues collected from the cecum, proximal colon, and  
153 distal colon. Similar to what was observed with the stool samples, the alpha diversity was lower  
154 in the PEG-treated mice compared to clindamycin treated mice (Fig. 3A, Data Set S1, sheet 6).  
155 The alpha diversity of the tissue-associated community increased in PEG-treated mice collected  
156 at 20 and 30 days post-challenge (Fig. 3A). Group ( $R^2 = 0.33$ ), time point ( $R^2 = 0.11$ ), and their  
157 interactions with other variables (cage, experiment number, and sample type) explained the majority  
158 of the variation observed in mucosal communities (PERMANOVA combined  $R^2 = 0.83$ ,  $P < 0.05$ ,  
159 Fig. 3B, Data Set S1, sheet 7). We saw the greatest difference in the relative abundance of the  
160 mucosal microbiota between treatment groups (clindamycin, 5-day PEG, and 5-day PEG plus  
161 clindamycin) at 6 days post-challenge with 10 genera that were significantly different ( $P < 0.05$ ) in  
162 all three of the tissue types we collected (cecum, proximal colon, and distal colon; Fig. S2A, Data  
163 Set S1, sheet 8, 9, and 10). Interestingly, *Peptostreptococcaceae* (the family with a sequence that  
164 matches *C. difficile*) was one of the genera that had a significant difference in relative abundance  
165 between treatment groups at 6 days post-challenge. This population was primarily only present  
166 in the 5-day PEG treatment group of mice and decreased in the proximal and distal colon tissues  
167 over time (Fig. S2B). By 30 days post-challenge, only the relative abundances of *Bacteroides*,  
168 *Clostridiales*, *Firmicutes*, and *Ruminococcaceae* were different between treatment groups and  
169 only in the cecum tissues (Fig. 3C, Fig. 2E, Data Set S1, sheet 8). Thus, PEG treatment had a  
170 significant impact on the mucosal microbiota and we detected *C. difficile* sequences in the cecum,  
171 proximal colon, and distal colon tissue communities.

172 Because there were differences in the mucosal microbiota, including detectable *C. difficile*  
173 sequences in tissues from PEG-treated mice relative to mice treated with clindamycin, we next  
174 examined the severity of *C. difficile* challenge by evaluating cecum and colon histopathology (27).  
175 However, we found there was no difference in cecum and colon scores between clindamycin



176 and PEG-treated mice that were challenged with *C. difficile* at 4 days post-challenge (Fig. 3D),  
177 the time point typically examined in *C. difficile* 630 challenged mice (28). We also looked at 6  
178 days post-challenge because that was when there was a large difference in *C. difficile* density  
179 between PEG- and clindamycin-treated mice (Fig. 1C). Although there was a slight difference in  
180 the histopathology score of the colon between PEG and clindamycin-treated mice, there was not a  
181 significant difference in the cecum and the overall score was relatively low (1.5 to 2.5 out of 12, Fig.  
182 3E). Therefore, although PEG treatment had a disruptive effect on the mucosal microbiota, the  
183 impact of *C. difficile* challenge on the cecum and colon was similar between PEG and clindamycin  
184 treated mice.

185 ***C. difficile* challenge did not have a synergistic disruptive effect on the microbiota of**  
186 **PEG-treated mice.** Because *C. difficile* itself can have an impact on the microbiota (29), we  
187 also sequenced the tissue and stools of mock-challenged mice treated with clindamycin or PEG.  
188 Examining the stools of the mock-challenged mice revealed similar bacterial disruptions as the *C.*  
189 *difficile* challenged mice (Fig. S3A-C). Similarly, there was no difference between the communities  
190 found in the tissues of mock and *C. difficile* challenged mice (Fig. S3D-F). Thus, most of the  
191 microbiota alterations we observed in the PEG-treated mice were a result of the laxative and not an  
192 interaction between the laxative and *C. difficile*.

193 **1-day laxative treatment resulted in transient *C. difficile* colonization and minor microbiota**  
194 **disruption.** Next, we examined how a shorter osmotic laxative perturbation would impact the  
195 microbiome and susceptibility to *C. difficile*. We administered either a 1-day PEG treatment, a  
196 1-day PEG treatment with a 1-day recovery period, or clindamycin to mice before challenging them  
197 with *C. difficile* (Fig. 3A). In contrast to the 5-day PEG treated mice, the 1-day PEG groups were  
198 only transiently colonized and cleared *C. difficile* by 7 days post-challenge (Fig. 3B). The stool  
199 communities of the 1-day PEG treatment groups were also only transiently disrupted, with Shannon  
200 diversity recovering by 7 days post-challenge (Fig. 3C-D, Data Set S1, sheets 11 and 12). We found  
201 the relative abundances of 14 genera were impacted by treatment, but recovered close to baseline  
202 levels by 7 days post-challenge including *Enterobacteriaceae*, *Clostridiales*, *Porphyromonadaceae*,  
203 and *Ruminococcaceae* (Fig. 3E, Data Set S1, sheet 13 and 14). These findings suggest the  
204 duration of the PEG treatment was relevant, with shorter treatments resulting in a transient loss of

205 *C. difficile* colonization resistance.

206 **Post-challenge laxative treatment disrupted clearance in clindamycin-treated mice**  
207 **regardless of whether an FMT was also administered.** Since a 1-day PEG treatment resulted  
208 in a more mild perturbation of the microbiota, we decided to use the 1-day treatment to examine the  
209 hypothesis that PEG helps to flush *C. difficile* spores from the intestine. This hypothesis is proposed  
210 in the discussion section of FMT studies where bowel prep is part of the preparation undergone by  
211 patients receiving FMTs via colonoscopy (20–23). To examine the impact of PEG treatment on  
212 *C. difficile* clearance, we treated 4 groups of mice with clindamycin and then challenged all mice  
213 with *C. difficile* before administering the following treatments: no additional treatment, 1-day PEG  
214 immediately after challenge, and 1-day PEG treatment 3 days after challenge followed by either  
215 administration of an FMT or PBS solution by oral gavage (Fig. 5A). Contrary to the hypothesis, all  
216 groups of mice that received PEG exhibited prolonged *C. difficile* colonization (Fig. 5B).

217 We were also interested in exploring whether PEG might help with engraftment in the context of  
218 FMTs. An FMT was prepared under anaerobic conditions using stool collected from the same  
219 group of mice pre-treatment representing the baseline community. The FMT appeared to partially  
220 restore Shannon diversity but not richness (Fig. 5C-D, Data Set S1, sheets 15 and 16). Similarly,  
221 we saw some overlap between the communities of mice that received FMT and the mice treated  
222 with only clindamycin after 5 days post-challenge (Fig. 6A, Data Set S1, sheet 17). The increase  
223 in Shannon diversity suggests that the FMT did have an impact on the microbiota, despite seeing  
224 prolonged *C. difficile* colonization in the FMT treated mice. However, only the relative abundances  
225 of *Bacteroidales* and *Porphyromonadaceae* consistently differed between the mice that received  
226 either an FMT or PBS gavage (Fig. 6B). Overall, we found the relative abundances of 24 genera  
227 were different between treatment groups over multiple time points (Data Set S1, sheet 18). For  
228 example, the relative abundance of *Akkermansia* was increased and the relative abundances of  
229 *Ruminococcaceae*, *Clostridiales*, *Lachnospiraceae*, and *Oscillibacter* were decreased in mice that  
230 received PEG after *C. difficile* challenge relative to clindamycin treated mice (Fig. 6C). In sum,  
231 administering PEG actually prolonged *C. difficile* colonization, including in mice that received an  
232 FMT, which only restored 2 bacterial genera.

233 **Five-day post-challenge community data can predict which mice will have prolonged**  
234 ***C. difficile* colonization.** After identifying bacteria associated with the 5-day, 1-day and  
235 post-challenge 1-day PEG treatments, we examined the bacteria that influenced prolonged *C.*  
236 *difficile* colonization. We trained 3 machine learning models (random forest, logistic regression,  
237 and support vector machine) with bacterial community data from 5 days post-challenge to predict  
238 whether the mice were still colonized with *C. difficile* 10 days post-challenge. We chose to predict  
239 the status based on communities 5 days post-challenge because that was the earliest time point  
240 where we saw a treatment effect in the post-challenge 1-day PEG experiments. The random  
241 forest model had the highest performance (median AUROC = 0.90, Data Set S1, sheet 19) and  
242 indicated that the 5-day post challenge microbiota was an excellent predictor of prolonged *C.*  
243 *difficile* colonization. Next, we performed a permutation importance test to identify the bacteria  
244 that were the top contributors to the random forest model for predicting prolonged *C. difficile*  
245 colonization. We selected 10 genera that contributed the most to our model's performance (Fig.  
246 7A) and examined their relative abundance at 5 days post-challenge, the time point used to predict  
247 *C. difficile* colonization status on day 10 (Fig. 7B). Next, we focused on the 5 genera that had a  
248 greater than 1% relative abundance in either the cleared or colonized mice and examined how the  
249 bacteria changed over time. We found *Enterobacteriaceae* and *Bacteroides* tended to consistently  
250 have a higher relative abundance, the relative abundance of *Akkermansia* was initially low and then  
251 increased, and *Porphyromonadaceae* and *Lachnospiraceae* had a lower relative abundance in the  
252 mice with prolonged colonization compared to the mice that cleared *C. difficile* (Fig. 7C). Together  
253 these results suggest a combination of low and high abundance bacterial genera influence the  
254 prolonged colonization observed in 5-day PEG and post-challenge 1-day PEG treated mice.

## 255 **Discussion**

256 While the disruptive effect of antibiotics on *C. difficile* colonization resistance is well established,  
257 the extent to which other drugs such as laxatives disrupt colonization resistance was unclear. By  
258 following mice treated with an osmotic laxative over time, we found that a 5-day PEG treatment  
259 before challenge resulted in prolonged *C. difficile* colonization, while a 1-day PEG treatment resulted  
260 in transient colonization without the use of antibiotics. The differences in *C. difficile* colonization

261 dynamics between the 5- and 1-day PEG treated mice were associated with differences in the  
262 degree to which treatments disrupted the microbiota. Additionally, the intestinal communities of  
263 5-day PEG treated mice did not regain colonization resistance after a 10-day recovery period. In  
264 contrast to the other 5-day PEG treatment groups, *C. difficile* was not immediately detectable in  
265 the stools of most of the mice in the 10-day recovery group. We also examined the impact of PEG  
266 treatment after *C. difficile* challenge. In opposition to the hypothesis suggested by the literature, we  
267 found that PEG treatment prolonged colonization relative to mice that only received clindamycin  
268 treatment. We identified patterns in the relative abundances of *Bacteroides*, *Enterobacteriaceae*,  
269 *Akkermansia*, *Porphyromonadaceae*, and *Lachnospiraceae* that were associated with prolonged *C.*  
270 *difficile* colonization (Fig. 8). Overall, our results demonstrated that osmotic laxative treatment alone  
271 rendered mice susceptible to *C. difficile* colonization and the duration of colonization depended on  
272 the length of PEG treatment and whether treatment was administered before or after challenge.

273 In addition to altering composition, laxative treatment may alter microbiota-produced metabolites. A  
274 previous study demonstrated that a 5-day treatment of 10% PEG depleted acetate and butyrate  
275 and increased succinate compared to untreated mice (15). While we did not perform metabolomic  
276 analysis, we did see bacteria known to produce beneficial metabolites were depleted in mice  
277 that cleared *C. difficile* compared to mice with prolonged colonization. For example, *Oscillibacter*  
278 *valericigenes* can produce the SCFA valerate (30), and separate studies demonstrated valerate is  
279 depleted after clindamycin treatment and inhibited *C. difficile* growth *in vitro* and in C57BL/6 mice  
280 (31, 32). Similarly, *Acetatifactor* can produce acetate and butyrate (33), SCFAs that are decreased  
281 in mice with prolonged *C. difficile* infection after antibiotic treatment (34). Thus protective bacteria  
282 and their metabolites could be depleted by osmotic laxative treatment depending on the timing  
283 and duration of treatment.

284 One possible explanation for the prolonged *C. difficile* colonization in 5-day PEG treated mice, might  
285 be due to the bacteria's persistence in the mucosal compartment. In fact, it has been hypothesized  
286 that *C. difficile* biofilms may serve as reservoirs for recurrent infections (35) and *C. difficile* biofilms  
287 in the mucus layer were recently identified in patients as aggregates with *Fusobacterium nucleatum*  
288 (36). There was an interesting pattern of increased *Enterobacteriaceae*, *Bacteroides*, and *C.*  
289 *difficile* in both the stool and mucosal communities of PEG-treated mice suggesting a potential

290 synergy. *Bacteroides* has the potential to degrade mucus and the osmotic laxative may have allowed  
291 *Bacteroides* to colonize the mucosal niche by degrading mucin glycans with glycosyl hydrolases  
292 that are absent in *C. difficile* (37). *Bacteroides* persistence in the mucosal tissue might also have  
293 helped *Enterobacteriaceae* to colonize the region, as a synergy between mucus-degrading *B.*  
294 *fragilis* and *E. coli* has previously been described (38). A separate study demonstrated *C. difficile*  
295 was present in the outer mucus layer and associated with *Enterobacteriaceae* and *Bacteroidaceae*  
296 using fluorescent in situ hybridization (FISH) staining (39). However, protective roles for *Bacteroides*  
297 have also been demonstrated. For example, *B. fragilis* prevented CDI morbidity in a mouse model  
298 and inhibited *C. difficile* adherence *in vitro* (40). In coculture experiments, *B. longum* decreased  
299 *C. difficile* biofilm formation while *B. thetaiotamicron* enhanced biofilm formation (41) and *B. dorei*  
300 reduced *C. difficile* growth in a 9-species community *in vitro* (42). Therefore, whether *Bacteroides*  
301 is detrimental or beneficial in the context of *C. difficile* infection or colonization is still unclear, but  
302 the niche and interactions with other bacteria may contribute.

303 *Akkermansia* is also a mucin degrader with potentially beneficial or detrimental roles depending on  
304 context in other diseases (43, 44). In our study, the relative abundance of *Akkermansia* shifted over  
305 time between groups of mice that either cleared *C. difficile* or had prolonged colonization. In the stool  
306 it was initially increased in mice that cleared *C. difficile*, but shifted after 5-days post-challenge so  
307 that it was increased in mice that had prolonged colonization. In the context of CDIs, some studies  
308 suggest a protective role (45, 46), while others suggest a detrimental role because *Akkermansia*  
309 was positively correlated with *C. difficile* (47–50). Because the relative abundance of *Akkermansia*  
310 was dynamic in our study, it is unclear whether *Akkermansia* helps with clearance of *C. difficile* or  
311 allows it to persist. A better understanding how *C. difficile* interacts with the mucosal microbiota  
312 may lead to insights into CDIs, asymptomatic *C. difficile* carriage, and colonization resistance.

313 Despite identifying an altered compositional profile that included higher relative abundance of  
314 the *C. difficile* sequence in the mucosal tissues of mice treated with 5-day PEG compared to the  
315 clindamycin group, we did not see a difference in histopathology scores between the groups. One  
316 reason there was no difference could be the *C. difficile* strain used, *C. difficile* 630 results in mild  
317 histopathology summary scores in mice compared to VPI 10463 despite both strains producing  
318 toxin in mice (51). Part of our hypothesis for why there could have been increased histopathology

319 scores in PEG-treated mice was because PEG was previously shown to disrupt the mucus layer  
320 in mice. However, recent studies demonstrated that broad spectrum antibiotics can also disrupt  
321 the host mucosal barrier in mice (52, 53). Further research is needed to tease out the interplay  
322 between medications that influence the mucus layer and different strains of *C. difficile* in the context  
323 of CDIs.

324 It is more difficult to interpret what are findings mean in the context of *C. difficile* colonization  
325 resistance in human patients. The main difficulty being that most hospitals recommend not  
326 performing *C. difficile* testing if the patient is currently taking a laxative. This recommendation  
327 is in accordance with the Infectious Diseases Society of America and Society for Healthcare  
328 Epidemiology of America guidelines (54). The rationale behind the recommendation is that patients  
329 taking laxatives may be asymptotically colonized with *C. difficile*, resulting in unnecessary  
330 antibiotic treatment (55–57). Furthermore, some studies identified laxatives as a risk factor for  
331 developing CDIs or recurrent CDIs (58–60) and a recent study found the proportion of severe CDIs  
332 was similar between patients taking and not taking laxatives (61). However, there have also been  
333 some studies that suggest laxatives are not a risk factor for developing CDIs (62, 63). Although, it  
334 is unclear whether laxatives impact CDI susceptibility in human patients, it is clear that laxatives  
335 also have a transient impact on the human microbiota (13, 64–67). Additional studies to examine  
336 the relationship between laxatives, *C. difficile* colonization, and CDIs are warranted.

337 Considering laxatives are also used to prepare patients when administering fecal microbiota  
338 transplants via colonoscopy to treat recurrent CDIs, it will be important to determine whether  
339 osmotic laxatives impact *C. difficile* clearance in the human intestinal tract. It is still unclear what  
340 the best administration route is because there have been no studies designed to evaluate the best  
341 administration route for FMTs (68). Nevertheless, results from the FMT National Registry where  
342 85% of FMTs were delivered by colonoscopy demonstrate FMTs are highly effective treatment for  
343 recurrent CDIs with 90% achieving resolution in the 1 month follow-up window (69). A surprising  
344 number of studies continue to hypothesize that PEG or bowel preparation can clear *C. difficile*  
345 spores and toxins despite the paucity of supporting evidence (20–23). There was even a clinical  
346 trial (NCT01630096) designed to examine whether administering PEG 3350 (NuLYTELY) prior to  
347 antibiotic treatment reduced disease severity that started recruitment in 2012 (70), but no results

348 have been posted to date. Here we sought to evaluate the impact of treating *C. difficile* colonized  
349 mice with PEG (with or without FMT) and found clearance was delayed. Further studies are needed  
350 to understand the impact of osmotic laxatives on *C. difficile* colonization resistance and clearance  
351 in human patients receiving FMTs.

352 We have demonstrated that osmotic laxative treatment alone has a substantial impact on the  
353 microbiota and rendered mice susceptible to prolonged *C. difficile* colonization in contrast to  
354 clindamycin-treated mice. The duration and timing of the laxative treatment impacted the duration of  
355 *C. difficile* colonization, with only 5-day PEG and post-challenge 1-day PEG treatments prolonging  
356 colonization compared to clindamycin treated mice. Further studies are warranted to ascertain  
357 whether laxatives have a similar impact on *C. difficile* colonization resistance on the human  
358 microbiota.

## 359 **Acknowledgements**

360 We thank members of the Schloss lab for feedback on planning the experiments and data  
361 presentation. We thank Andrew Henry for help with media preparation and bacterial culture and  
362 the Microbiology and Immunology department's postdoctoral association writing group members  
363 for their feedback on manuscript drafts. We also thank the Unit for Laboratory Animal Medicine at  
364 the University of Michigan for maintaining our mouse colony and providing the institutional support  
365 for our mouse experiments. Finally, we thank Kwi Kim, Austin Campbell, and Kimberly Vendrov  
366 for their help in maintaining the Schloss lab's anaerobic chamber. This work was supported by  
367 the National Institutes of Health (U01AI124255). ST was supported by the Michigan Institute for  
368 Clinical and Health Research Postdoctoral Translation Scholars Program (UL1TR002240 from the  
369 National Center for Advancing Translational Sciences).

## 370 **Materials and Methods**

371 **Animals.** All experiments were approved by the University of Michigan Animal Care and Use  
372 Committee IACUC (protocol numbers PRO00006983 and PRO00008975). All mice were C57Bl/6  
373 and part of the Schloss lab colony which was established in 2010 with mice donated from Vincent  
374 Young's lab colony (established with mice purchased from The Jackson Laboratory in 2002). We

375 used 7-19 week old female mice for all experiments. This allowed us to break up littermates and  
376 distribute them as evenly as possible across treatment groups in order to minimize microbiota  
377 differences prior to starting treatments with medications. During the experiment, mice were housed  
378 at a density of 2-3 mice per cage, with the majority of cages limited to two mice.

379 **Drug treatments.** For PEG treatment groups, fifteen percent PEG 3350 (Miralax) was administered  
380 in the drinking water for either 5 or 1-day periods depending on the experiment. PEG solution  
381 was prepared fresh every 2 days in distilled water and administered to the mice in water bottles.  
382 Clindamycin treatment groups received distilled water in water bottles during the PEG-treatment  
383 periods, with the water being changed at the same frequency. For clindamycin treatment, groups of  
384 mice received 10 mg/kg clindamycin (Sigma-Aldrich) via intraperitoneal injection. All PEG treatment  
385 groups received a sham intraperitoneal injection containing filter sterilized saline.

386 ***C. difficile* challenge model.** Mice were challenged with 25 microliters containing  $10^5$  *C. difficile*  
387 630 spores, except for 1 experiment where the concentration was  $10^3$  (Fig. 5A). All mock challenged  
388 mice received 25 ul vehicle solution (Ultrapure water). A Dymax stepper pipette was used to  
389 administer the same challenge dose to mice via oral gavage. Mice were weighed daily throughout  
390 the experiment and stool was collected for quantifying *C. difficile* CFU and 16S rRNA gene  
391 sequencing. There were two groups of mice that received either a PBS or fecal microbiota  
392 transplant (FMT) gavage post-PEG treatment. The fecal microbiota transplant was prepared with  
393 stool samples collected from the mice in the experiment prior to the start of any treatments. The  
394 stool samples were transferred to an anaerobic chamber and diluted 1:10 in reduced PBS and  
395 glycerol was added to make a 15% glycerol solution. The solution was then aliquoted into tubes and  
396 stored at  $-80^{\circ}\text{C}$  until the day of the gavage. An aliquot of both the FMT and PBS solutions were also  
397 set aside in the  $-80^{\circ}\text{C}$  for 16S rRNA gene sequencing. The day of the gavage, aliquots were thawed  
398 and centrifuged at 7500 RPM for 1 minute. The supernatant was then transferred to a separate  
399 tube to prevent the gavage needle from clogging with debris during gavage. The PBS solution that  
400 was administered to the other group was also 15% glycerol. Each mouse was administered 100  
401 microliters of either the FMT or PBS solution via gavage. When we refer to mice that cleared *C.*  
402 *difficile*, we mean that no *C. difficile* was detected in the first serial dilution (limit of detection: 100  
403 CFU). In some experiments, we collected tissues for 16SrRNA gene sequencing, histopathology,



404 or both. For 16S rRNA gene sequencing, we collected small snips of cecum, proximal colon, and  
405 distal colon tissues in microcentrifuge tubes, snap froze in liquid nitrogen, and stored at -80°C.  
406 For histopathology, cecum and colon tissues were placed into separate cassettes, fixed, and  
407 then submitted to McClinchey Histology Labs (Stockbridge, MI) for processing, embedding, and  
408 hematoxylin and eosin (H&E) staining.

409 ***C. difficile* quantification.** Stool samples from mice were transferred to an anaerobic chamber and  
410 serially diluted in reduced PBS. Serial dilutions were plated onto taurocholate-cycloserine-cefoxitin-fructose  
411 agar (TCCFA) plates plates and counted after 24 hours of incubation at 37°C. Stool samples  
412 collected from the mice on day 0 post-challenge were also plated onto TCCFA plates to ensure  
413 mice were not already colonized with *C. difficile* prior to challenge.

414 **16S rRNA gene sequencing.** Stool samples were stored at -80°C and were placed into 96-well  
415 plates for DNA extractions and library preparation. DNA was extracted using the DNeasy Powersoil  
416 HTP 96 kit (Qiagen) and an EpMotion 5075 automated pipetting system (Eppendorf). For library  
417 preparation, each plate had a mock community control (ZymoBIOMICS microbial community DNA  
418 standards) and a negative control (water). The V4 region of the 16S rRNA gene was amplified with  
419 the AccuPrime Pfx DNA polymerase (Thermo Fisher Scientific) using custom barcoded primers, as  
420 previously described (71). The PCR amplicons were normalized (SequalPrep normalizatin plate kit  
421 from Thermo Fisher Scientific), pooled and quantified (KAPA library quantification kit from KAPA  
422 Biosystems), and sequenced with the MiSeq system (Illumina).

423 **16S rRNA gene sequence analysis.** All sequences were processed with mothur (v. 1.43) using  
424 a previously published protocol (71, 72). Paired sequencing reads were combined and aligned  
425 with the SILVA (v. 132) reference database (73) and taxonomy was assigned with a modified  
426 version of the Ribosomal Database Project reference sequences (v. 16) (74). The error rate for  
427 are sequencing data was 0.0559% based on the 17 mock communities we ran with the samples.  
428 Samples were rarefied to 1,000 sequences, 1,000 times for alpha and beta diversity analyses  
429 in order to account for uneven sequencing across samples. All but 3 of the 17 water controls  
430 had fewer than 1000 sequences. PCoAs were generated based on Bray-Curtis Index distance  
431 matrices. Permutational multivariate analysis of variance (PERMANOVA) tests were performed on

432 mothur-generated Bray-Curtis distance matrices with the `adonis` function from the `vegan` R package  
433 (75).

434 **Histopathology.** H&E stained sections of cecum and colon tissues collected at either 0, 4, or 6  
435 days post-challenge were coded to be scored in a blinded manner by a board-certified veterinary  
436 pathologist (ILB). Slides were evaluated using a scoring system developed for mouse models of *C.*  
437 *difficile* infection (51). Each slide was evaluated for edema, cellular infiltration, and inflammation  
438 and given a score ranging from 0-4. The summary score was calculated by combining the scores  
439 from the 3 categories and ranged from 0-12.

440 **Classification model training and evaluation.** We used the `mikropml` package to train and  
441 evaluate models to predict *C. difficile* colonization status 10 days post-challenge where mice were  
442 categorized as either cleared or colonized (76, 77). We removed the *C. difficile* genus relative  
443 abundance data prior to training the model. Input community relative abundance data at the  
444 genus level from 5 days post-challenge was used to generate random forest, logistic regression,  
445 and support vector machine classification models to predict *C. difficile* colonization status 10 days  
446 post-challenge. To accommodate the small number of samples in our data set we used 50% training  
447 and 50% testing splits with repeated 2-fold cross-validation of the training data for hyperparameter  
448 tuning. Permutation importance was performed as described previously (78) using `mikropml` (76,  
449 77) with the random forest model because it had the highest AUROC value.

450 **Statistical analysis.** R (v. 4.0.2) and the `tidyverse` package (v. 1.3.0) were used for statistical  
451 analysis (79, 80). Kruskal-Wallis tests with Benjamini-Hochberg correction for testing multiple time  
452 points were used to analyze differences in *C. difficile* CFU, mouse weight change, and alpha  
453 diversity between treatment groups. Paired Wilcoxon rank signed rank tests were used to identify  
454 genera impacted by treatments on matched pairs of samples from 2 time points. Bacterial relative  
455 abundances that varied between treatment groups at the genus level were identified with the  
456 Kruskal-Wallis test with Benjamini-Hochberg correction for testing all identified OTUs, followed by  
457 pairwise Wilcoxon comparisons with Benjamini-Hochberg correction.

458 **Code availability.** Code for data analysis and generating this paper with accompanying figures is  
459 available at [https://github.com/SchlossLab/Tomkovich\\_PEG3350\\_mSphere\\_2021](https://github.com/SchlossLab/Tomkovich_PEG3350_mSphere_2021).

460 **Data availability.** The 16S rRNA sequencing data have been deposited in the National Center for  
461 Biotechnology Information Sequence Read Archive (BioProject Accession no. PRJNA727293).

## 462 **References**

- 463 1. Britton RA, Young VB. 2014. Role of the intestinal microbiota in resistance to colonization by  
464 *Clostridium difficile*. *Gastroenterology* 146:1547–1553.
- 465 2. Maier L, Pruteanu M, Kuhn M, Zeller G, Telzerow A, Anderson EE, Brochado AR, Fernandez  
466 KC, Dose H, Mori H, Patil KR, Bork P, Typas A. 2018. Extensive impact of non-antibiotic drugs on  
467 human gut bacteria. *Nature* 555:623–628.
- 468 3. Bastard QL, Al-Ghalith GA, Grégoire M, Chapelet G, Javaudin F, Dailly E, Batard E, Knights D,  
469 Montassier E. 2017. Systematic review: Human gut dysbiosis induced by non-antibiotic prescription  
470 medications. *Alimentary Pharmacology & Therapeutics* 47:332–345.
- 471 4. Vila AV, Collij V, Sanna S, Sinha T, Imhann F, Bourgonje AR, Mujagic Z, Jonkers DMAE,  
472 Masclee AAM, Fu J, Kurilshikov A, Wijmenga C, Zhernakova A, Weersma RK. 2020. Impact of  
473 commonly used drugs on the composition and metabolic function of the gut microbiota. *Nature*  
474 *Communications* 11.
- 475 5. Oh J, Makar M, Fusco C, McCaffrey R, Rao K, Ryan EE, Washer L, West LR, Young VB, Gutttag J,  
476 Hooper DC, Shenoy ES, Wiens J. 2018. A generalizable, data-driven approach to predict daily risk  
477 of *Clostridium difficile* infection at two large academic health centers. *Infection Control & Hospital*  
478 *Epidemiology* 39:425–433.
- 479 6. Mora AL, Salazar M, Pablo-Caeiro J, Frost CP, Yadav Y, DuPont HL, Garey KW. 2012. Moderate  
480 to high use of opioid analgesics are associated with an increased risk of *Clostridium difficile* infection.  
481 *The American Journal of the Medical Sciences* 343:277–280.
- 482 7. Nehra AK, Alexander JA, Loftus CG, Nehra V. 2018. Proton pump inhibitors: Review of emerging  
483 concerns. *Mayo Clinic Proceedings* 93:240–246.
- 484 8. Krishna SG, Zhao W, Apewokin SK, Krishna K, Chepyala P, Anaissie EJ. 2013. Risk factors,  
485 preemptive therapy, and antiperistaltic agents for *Clostridium difficile* infection in cancer patients.  
486 *Transplant Infectious Disease* n/a–n/a.

- 487 9. Tomkovich S, Lesniak NA, Li Y, Bishop L, Fitzgerald MJ, Schloss PD. 2019. The proton  
488 pump inhibitor omeprazole does not promote *Clostridioides difficile* colonization in a murine model.  
489 mSphere 4.
- 490 10. Vandeputte D, Falony G, Vieira-Silva S, Tito RY, Joossens M, Raes J. 2015. Stool consistency  
491 is strongly associated with gut microbiota richness and composition, enterotypes and bacterial  
492 growth rates. Gut 65:57–62.
- 493 11. Vujkovic-Cvijin I, Sklar J, Jiang L, Natarajan L, Knight R, Belkaid Y. 2020. Host variables  
494 confound gut microbiota studies of human disease. Nature 587:448–454.
- 495 12. Schubert AM, Rogers MAM, Ring C, Mogle J, Petrosino JP, Young VB, Aronoff DM,  
496 Schloss PD. 2014. Microbiome data distinguish patients with *Clostridium difficile* infection and  
497 non-*C. difficile*-associated diarrhea from healthy controls. mBio 5.
- 498 13. Nagata N, Tohya M, Fukuda S, Suda W, Nishijima S, Takeuchi F, Ohsugi M, Tsujimoto T,  
499 Nakamura T, Shimomura A, Yanagisawa N, Hisada Y, Watanabe K, Imbe K, Akiyama J, Mizokami  
500 M, Miyoshi-Akiyama T, Uemura N, Hattori M. 2019. Effects of bowel preparation on the human gut  
501 microbiome and metabolome. Scientific Reports 9.
- 502 14. Kashyap PC, Marcobal A, Ursell LK, Larauche M, Duboc H, Earle KA, Sonnenburg ED, Ferreyra  
503 JA, Higginbottom SK, Million M, Tache Y, Pasricha PJ, Knight R, Farrugia G, Sonnenburg JL. 2013.  
504 Complex interactions among diet, gastrointestinal transit, and gut microbiota in humanized mice.  
505 Gastroenterology 144:967–977.
- 506 15. Ferreyra JA, Wu KJ, Hryckowian AJ, Bouley DM, Weimer BC, Sonnenburg JL. 2014. Gut  
507 microbiota-produced succinate promotes *C. difficile* infection after antibiotic treatment or motility  
508 disturbance. Cell Host & Microbe 16:770–777.
- 509 16. Tropini C, Moss EL, Merrill BD, Ng KM, Higginbottom SK, Casavant EP, Gonzalez CG, Fremin B,  
510 Bouley DM, Elias JE, Bhatt AS, Huang KC, Sonnenburg JL. 2018. Transient osmotic perturbation  
511 causes long-term alteration to the gut microbiota. Cell 173:1742–1754.e17.
- 512 17. VanInsberghe D, Elsherbini JA, Varian B, Poutahidis T, Erdman S, Polz MF. 2020. Diarrhoeal

- 513 events can trigger long-term *Clostridium difficile* colonization with recurrent blooms. Nature  
514 Microbiology 5:642–650.
- 515 18. Olson A, Diebel LN, Liberati DM. 2013. Effect of host defenses on *Clostridium difficile*  
516 toxin-induced intestinal barrier injury. Journal of Trauma and Acute Care Surgery 74:983–990.
- 517 19. Diebel LN, Liberati DM. 2014. Reinforcement of the intestinal mucus layer protects against  
518 *Clostridium difficile* intestinal injury in vitro. Journal of the American College of Surgeons  
519 219:460–468.
- 520 20. Nood E van, Vrieze A, Nieuwdorp M, Fuentes S, Zoetendal EG, Vos WM de, Visser CE, Kuijper  
521 EJ, Bartelsman JFWM, Tijssen JGP, Speelman P, Dijkgraaf MGW, Keller JJ. 2013. Duodenal infusion  
522 of donor feces for recurrent *Clostridium difficile*. New England Journal of Medicine 368:407–415.
- 523 21. Razik R, Osman M, Lieberman A, Allegretti JR, Kassam Z. 2017. Faecal microbiota  
524 transplantation for *Clostridium difficile* infection: A multicentre study of non-responders. Medical  
525 Journal of Australia 207:159–160.
- 526 22. Postigo R, Kim JH. 2012. Colonoscopic versus nasogastric fecal transplantation for the  
527 treatment of *Clostridium difficile* infection: A review and pooled analysis. Infection 40:643–648.
- 528 23. Liacouras CA, Piccoli DA. 1996. Whole-bowel irrigation as an adjunct to the treatment of  
529 chronic, relapsing *Clostridium difficile* colitis. Journal of Clinical Gastroenterology 22:186–189.
- 530 24. Schubert AM, Sinani H, Schloss PD. 2015. Antibiotic-induced alterations of the murine gut  
531 microbiota and subsequent effects on colonization resistance against *Clostridium difficile*. mBio 6.
- 532 25. Jenior ML, Leslie JL, Young VB, Schloss PD. 2017. *Clostridium difficile* colonizes alternative  
533 nutrient niches during infection across distinct murine gut microbiomes. mSystems 2.
- 534 26. Tomkovich S, Stough JMA, Bishop L, Schloss PD. 2020. The initial gut microbiota and response  
535 to antibiotic perturbation influence *Clostridioides difficile* clearance in mice. mSphere 5.
- 536 27. Reeves AE, Theriot CM, Bergin IL, Huffnagle GB, Schloss PD, Young VB. 2011. The interplay  
537 between microbiome dynamics and pathogen dynamics in a murine model of *Clostridium difficile*

538 infection 2:145–158.

539 28. Dieterle MG, Putler R, Perry DA, Menon A, Abernathy-Close L, Perlman NS, Penkevich A,  
540 Standke A, Keidan M, Vendrov KC, Bergin IL, Young VB, Rao K. 2020. Systemic inflammatory  
541 mediators are effective biomarkers for predicting adverse outcomes in *Clostridioides difficile*  
542 infection. *mBio* 11.

543 29. Jenior ML, Leslie JL, Young VB, Schloss PD. 2018. *Clostridium difficile* alters the structure and  
544 metabolism of distinct cecal microbiomes during initial infection to promote sustained colonization.  
545 *mSphere* 3.

546 30. Iino T, Mori K, Tanaka K, Suzuki K-i, Harayama S. 2007. *Oscillibacter valericigenes* gen. Nov.,  
547 sp. Nov., a valerate-producing anaerobic bacterium isolated from the alimentary canal of a Japanese  
548 corbicula clam. *International Journal of Systematic and Evolutionary Microbiology* 57:1840–1845.

549 31. Jump RLP, Polinkovsky A, Hurlless K, Sitzlar B, Eckart K, Tomas M, Deshpande A, Nerandzic  
550 MM, Donskey CJ. 2014. Metabolomics analysis identifies intestinal microbiota-derived biomarkers  
551 of colonization resistance in clindamycin-treated mice. *PLoS ONE* 9:e101267.

552 32. McDonald JAK, Mullish BH, Pechlivanis A, Liu Z, Brignardello J, Kao D, Holmes E, Li JV, Clarke  
553 TB, Thursz MR, Marchesi JR. 2018. Inhibiting growth of *Clostridioides difficile* by restoring valerate,  
554 produced by the intestinal microbiota. *Gastroenterology* 155:1495–1507.e15.

555 33. Pfeiffer N, Desmarchelier C, Blaut M, Daniel H, Haller D, Clavel T. 2012. *Acetatifactor muris*  
556 gen. Nov., sp. Nov., a novel bacterium isolated from the intestine of an obese mouse. *Archives of*  
557 *Microbiology* 194:901–907.

558 34. Lawley TD, Clare S, Walker AW, Stares MD, Connor TR, Raisen C, Goulding D, Rad R,  
559 Schreiber F, Brandt C, Deakin LJ, Pickard DJ, Duncan SH, Flint HJ, Clark TG, Parkhill J, Dougan  
560 G. 2012. Targeted restoration of the intestinal microbiota with a simple, defined bacteriotherapy  
561 resolves relapsing *Clostridium difficile* disease in mice. *PLoS Pathogens* 8:e1002995.

562 35. Frost LR, Cheng JKJ, Unnikrishnan M. 2021. *Clostridioides difficile* biofilms: A mechanism of  
563 persistence in the gut? *PLOS Pathogens* 17:e1009348.

- 564 36. Engevik MA, Danhof HA, Auchtung J, Endres BT, Ruan W, Bassères E, Engevik AC, Wu Q,  
565 Nicholson M, Luna RA, Garey KW, Crawford SE, Estes MK, Lux R, Yacyshyn MB, Yacyshyn B,  
566 Savidge T, Britton RA, Versalovic J. 2021. *Fusobacterium nucleatum* adheres to *Clostridioides*  
567 *difficile* via the RadD adhesin to enhance biofilm formation in intestinal mucus. *Gastroenterology*  
568 160:1301–1314.e8.
- 569 37. Engevik MA, Engevik AC, Engevik KA, Auchtung JM, Chang-Graham AL, Ruan W, Luna RA,  
570 Hyser JM, Spinler JK, Versalovic J. 2020. Mucin-degrading microbes release monosaccharides  
571 that chemoattract *Clostridioides difficile* and facilitate colonization of the human intestinal mucus  
572 layer. *ACS Infectious Diseases* 7:1126–1142.
- 573 38. Dejea CM, Fathi P, Craig JM, Boleij A, Taddese R, Geis AL, Wu X, Shields CED, Hechenbleikner  
574 EM, Huso DL, Anders RA, Giardiello FM, Wick EC, Wang H, Wu S, Pardoll DM, Housseau F,  
575 Sears CL. 2018. Patients with familial adenomatous polyposis harbor colonic biofilms containing  
576 tumorigenic bacteria. *Science* 359:592–597.
- 577 39. Semenyuk EG, Poroyko VA, Johnston PF, Jones SE, Knight KL, Gerding DN, Driks A. 2015.  
578 Analysis of bacterial communities during *Clostridium difficile* infection in the mouse. *Infection and*  
579 *Immunity* 83:4383–4391.
- 580 40. Deng H, Yang S, Zhang Y, Qian K, Zhang Z, Liu Y, Wang Y, Bai Y, Fan H, Zhao X, Zhi F. 2018.  
581 *Bacteroides fragilis* prevents *Clostridium difficile* infection in a mouse model by restoring gut barrier  
582 and microbiome regulation. *Frontiers in Microbiology* 9.
- 583 41. Normington C, Moura IB, Bryant JA, Ewin DJ, Clark EV, Kettle MJ, Harris HC, Spittal W, Davis  
584 G, Henn MR, Ford CB, Wilcox MH, Buckley AM. 2021. Biofilms harbour *Clostridioides difficile*,  
585 serving as a reservoir for recurrent infection. *npj Biofilms and Microbiomes* 7.
- 586 42. Hassall J, Cheng J, Unnikrishnan M. 2021. Dissecting individual interactions between  
587 pathogenic and commensal bacteria within a multispecies gut microbial community. *mSphere* 6.
- 588 43. Cirstea M, Radisavljevic N, Finlay BB. 2018. Good bug, bad bug: Breaking through microbial  
589 stereotypes. *Cell Host & Microbe* 23:10–13.



- 590 44. Canha MB. 2015. Role of colonic microbiota in colorectal carcinogenesis: A systematic review.  
591 *Revista Española de Enfermedades Digestivas* 107.
- 592 45. Pereira FC, Wasmund K, Cobankovic I, Jehmlich N, Herbold CW, Lee KS, Sziranyi B, Vesely  
593 C, Decker T, Stocker R, Warth B, Bergen M von, Wagner M, Berry D. 2020. Rational design of a  
594 microbial consortium of mucosal sugar utilizers reduces *Clostridioides difficile* colonization. *Nature*  
595 *Communications* 11.
- 596 46. Rodriguez C, Taminiau B, Korsak N, Avesani V, Broeck JV, Brach P, Delmée M, Daube G. 2016.  
597 Longitudinal survey of *Clostridium difficile* presence and gut microbiota composition in a belgian  
598 nursing home. *BMC Microbiology* 16.
- 599 47. Sangster W, Hegarty JP, Schieffer KM, Wright JR, Hackman J, Toole DR, Lamendella R, Stewart  
600 DB. 2016. Bacterial and fungal microbiota changes distinguish *C. difficile* infection from other forms  
601 of diarrhea: Results of a prospective inpatient study. *Frontiers in Microbiology* 7.
- 602 48. Vakili B, Fateh A, Aghdaei HA, Sotoodehnejadnematalahi F, Siadat SD. 2020. Intestinal  
603 microbiota in elderly inpatients with *Clostridioides difficile* infection. *Infection and Drug Resistance*  
604 *Volume* 13:2723–2731.
- 605 49. Vakili B, Fateh A, Aghdaei HA, Sotoodehnejadnematalahi F, Siadat SD. 2020. Characterization  
606 of gut microbiota in hospitalized patients with *Clostridioides difficile* infection. *Current Microbiology*  
607 77:1673–1680.
- 608 50. Li X, Chu Q, Huang Y, Xiao Y, Song L, Zhu S, Kang Y, Lu S, Xu J, Ren Z. 2019. Consortium of  
609 probiotics attenuates colonization of *Clostridioides difficile*. *Frontiers in Microbiology* 10.
- 610 51. Theriot CM, Koumpouras CC, Carlson PE, Bergin II, Aronoff DM, Young VB. 2011.  
611 Cefoperazone-treated mice as an experimental platform to assess differential virulence of  
612 *Clostridium difficile* strains. *Gut Microbes* 2:326–334.
- 613 52. Kester JC, Brubaker DK, Velazquez J, Wright C, Lauffenburger DA, Griffith LG. 2020.  
614 *Clostridioides difficile*-associated antibiotics alter human mucosal barrier functions by  
615 microbiome-independent mechanisms. *Antimicrobial Agents and Chemotherapy* 64.

- 616 53. Bergstrom K, Shan X, Casero D, Batushansky A, Lagishetty V, Jacobs JP, Hoover C, Kondo  
617 Y, Shao B, Gao L, Zandberg W, Noyovitz B, McDaniel JM, Gibson DL, Pakpour S, Kazemian N,  
618 McGee S, Houchen CW, Rao CV, Griffin TM, Sonnenburg JL, McEver RP, Braun J, Xia L. 2020.  
619 Proximal colonderived o-glycosylated mucus encapsulates and modulates the microbiota. *Science*  
620 370:467–472.
- 621 54. McDonald LC, Gerding DN, Johnson S, Bakken JS, Carroll KC, Coffin SE, Dubberke ER, Garey  
622 KW, Gould CV, Kelly C, Loo V, Sammons JS, Sandora TJ, Wilcox MH. 2018. Clinical practice  
623 guidelines for *Clostridium difficile* infection in adults and children: 2017 update by the infectious  
624 diseases society of america (IDSA) and society for healthcare epidemiology of america (SHEA).  
625 *Clinical Infectious Diseases* 66:e1–e48.
- 626 55. Ahmad SM, Blanco N, Dewart CM, Dobosz A, Malani AN. 2017. Laxative use in the setting  
627 of positive testing for *Clostridium difficile* infection. *Infection Control & Hospital Epidemiology*  
628 38:1513–1515.
- 629 56. Bilinskaya A, Goodlet KJ, Nailor MD. 2018. Evaluation of a best practice alert to reduce  
630 unnecessary *Clostridium difficile* testing following receipt of a laxative. *Diagnostic Microbiology and*  
631 *Infectious Disease* 92:50–55.
- 632 57. Cook PP, Nichols S, Coogan M, Opera J, DeHart M. 2020. Reduction in testing and change in  
633 testing algorithm associated with decrease in number of nosocomial *Clostridioides (Clostridium)*  
634 *difficile* infections. *American Journal of Infection Control* 48:1019–1022.
- 635 58. Appaneal HJ, Caffrey AR, Beganovic M, Avramovic S, LaPlante KL. 2019. Predictors of  
636 *Clostridioides difficile* recurrence across a national cohort of veterans in outpatient, acute, and  
637 long-term care settings. *American Journal of Health-System Pharmacy* 76:581–590.
- 638 59. Dubberke ER, Yan Y, Reske KA, Butler AM, Doherty J, Pham V, Fraser VJ. 2011. Development  
639 and validation of a *Clostridium difficile* infection risk prediction model. *Infection Control & Hospital*  
640 *Epidemiology* 32:360–366.
- 641 60. Obritsch MD, Stroup JS, Carnahan RM, Scheck DN. 2010. *Clostridium difficile*-associated

642 diarrhea in a tertiary care medical center. Baylor University Medical Center Proceedings  
643 23:363–367.

644 61. White NC, Mendo-Lopez R, Papamichael K, Cuddemi CA, Barrett C, Daugherty K, Pollock N,  
645 Kelly CP, Alonso CD. 2019. Laxative use does not preclude diagnosis or reduce disease severity in  
646 *Clostridioides difficile* infection. Clinical Infectious Diseases 71:1472–1478.

647 62. Poirier D, Gervais P, Fuchs M, Roussy J-F, Paquet-Bolduc B, Trottier S, Longtin J, Loo VG,  
648 Longtin Y. 2019. Predictors of *Clostridioides difficile* infection among asymptomatic, colonized  
649 patients: A retrospective cohort study. Clinical Infectious Diseases 70:2103–2210.

650 63. Huang H, Wu S, Chen R, Xu S, Fang H, Weintraub A, Nord CE. 2014. Risk factors of *Clostridium*  
651 *difficile* infections among patients in a university hospital in shanghai, china. Anaerobe 30:65–69.

652 64. Gorkiewicz G, Thallinger GG, Trajanoski S, Lackner S, Stocker G, Hinterleitner T, Gully C,  
653 Högenauer C. 2013. Alterations in the colonic microbiota in response to osmotic diarrhea. PLoS  
654 ONE 8:e55817.

655 65. Shobar RM, Velineni S, Keshavarzian A, Swanson G, DeMeo MT, Melson JE, Losurdo J, Engen  
656 PA, Sun Y, Koenig L, Mutlu EA. 2016. The effects of bowel preparation on microbiota-related metrics  
657 differ in health and in inflammatory bowel disease and for the mucosal and luminal microbiota  
658 compartments. Clinical and Translational Gastroenterology 7:e143.

659 66. Drago L, Toscano M, Grandi RD, Casini V, Pace F. 2016. Persisting changes of intestinal  
660 microbiota after bowel lavage and colonoscopy. European Journal of Gastroenterology &  
661 Hepatology 28:532–537.

662 67. Jalanka J, Salonen A, Salojärvi J, Ritari J, Immonen O, Marciani L, Gowland P, Hoad C, Garsed  
663 K, Lam C, Palva A, Spiller RC, Vos WM de. 2014. Effects of bowel cleansing on the intestinal  
664 microbiota. Gut 64:1562–1568.

665 68. Kampouri E, Croxatto A, Prod'hom G, Guery B. 2021. *Clostridioides difficile* infection, still a  
666 long way to go. Journal of Clinical Medicine 10:389.

- 667 69. Kelly CR, Yen EF, Grinspan AM, Kahn SA, Atreja A, Lewis JD, Moore TA, Rubin DT, Kim AM,  
668 Serra S, Nersesova Y, Fredell L, Hunsicker D, McDonald D, Knight R, Allegretti JR, Pekow J, Absah  
669 I, Hsu R, Vincent J, Khanna S, Tangen L, Crawford CV, Mattar MC, Chen LA, Fischer M, Arsenescu  
670 RI, Feuerstadt P, Goldstein J, Kerman D, Ehrlich AC, Wu GD, Laine L. 2021. Fecal microbiota  
671 transplantation is highly effective in real-world practice: Initial results from the FMT national registry.  
672 *Gastroenterology* 160:183–192.e3.
- 673 70. Dieterle MG, Rao K, Young VB. 2018. Novel therapies and preventative strategies for primary  
674 and recurrent *Clostridiuml difficile* infections. *Annals of the New York Academy of Sciences*  
675 1435:110–138.
- 676 71. Kozich JJ, Westcott SL, Baxter NT, Highlander SK, Schloss PD. 2013. Development of a  
677 dual-index sequencing strategy and curation pipeline for analyzing amplicon sequence data on the  
678 MiSeq illumina sequencing platform. *Applied and Environmental Microbiology* 79:5112–5120.
- 679 72. Schloss PD, Westcott SL, Ryabin T, Hall JR, Hartmann M, Hollister EB, Lesniewski RA,  
680 Oakley BB, Parks DH, Robinson CJ, Sahl JW, Stres B, Thallinger GG, Horn DJV, Weber CF.  
681 2009. Introducing mothur: Open-source, platform-independent, community-supported software  
682 for describing and comparing microbial communities. *Applied and Environmental Microbiology*  
683 75:7537–7541.
- 684 73. Quast C, Pruesse E, Yilmaz P, Gerken J, Schweer T, Yarza P, Peplies J, Glöckner FO. 2012.  
685 The SILVA ribosomal RNA gene database project: Improved data processing and web-based tools.  
686 *Nucleic Acids Research* 41:D590–D596.
- 687 74. Cole JR, Wang Q, Fish JA, Chai B, McGarrell DM, Sun Y, Brown CT, Porras-Alfaro A, Kuske CR,  
688 Tiedje JM. 2013. Ribosomal database project: Data and tools for high throughput rRNA analysis.  
689 *Nucleic Acids Research* 42:D633–D642.
- 690 75. Oksanen J, Blanchet FG, Friendly M, Kindt R, Legendre P, McGlenn D, Minchin PR, O’Hara RB,  
691 Simpson GL, Solymos P, Stevens MHH, Szoecs E, Wagner H. 2018. Vegan: Community ecology  
692 package.

- 693 76. Topçuoğlu B, Lapp Z, Sovacool KL, Snitkin E, Wiens J, Schloss PD. 2020. mikRopML:  
694 User-friendly r package for robust machine learning pipelines.
- 695 77. Topçuoğlu B, Lapp Z, Sovacool K, Snitkin E, Wiens J, Schloss P. 2021. Mikropml: User-friendly  
696 r package for supervised machine learning pipelines. *Journal of Open Source Software* 6:3073.
- 697 78. Topçuoğlu BD, Lesniak NA, Ruffin MT, Wiens J, Schloss PD. 2020. A framework for effective  
698 application of machine learning to microbiome-based classification problems. *mBio* 11.
- 699 79. R Core Team. 2020. R: A language and environment for statistical computing. R Foundation for  
700 Statistical Computing, Vienna, Austria.
- 701 80. Wickham H, Averick M, Bryan J, Chang W, McGowan LD, François R, Golemund G, Hayes  
702 A, Henry L, Hester J, Kuhn M, Pedersen TL, Miller E, Bache SM, Müller K, Ooms J, Robinson D,  
703 Seidel DP, Spinu V, Takahashi K, Vaughan D, Wilke C, Woo K, Yutani H. 2019. Welcome to the  
704 tidyverse. *Journal of Open Source Software* 4:1686.

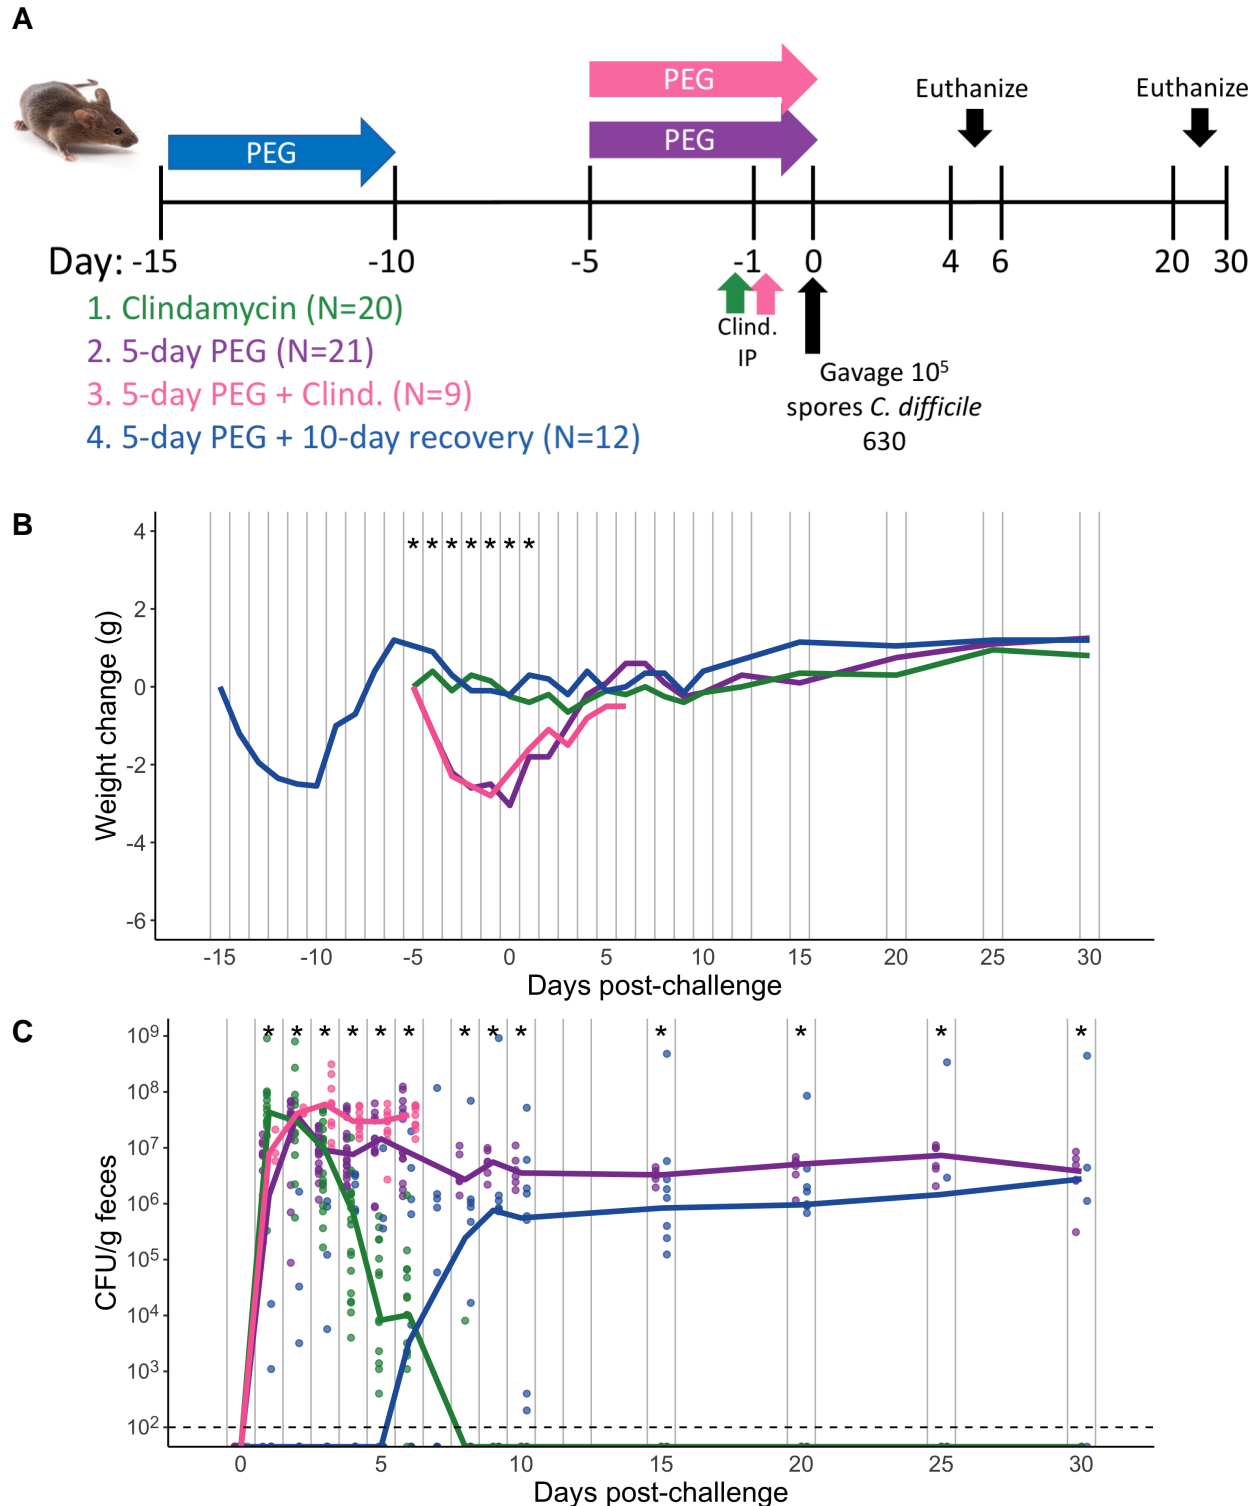

705

706 **Figure 1. 5-day PEG treatment prolongs susceptibility and mice become persistently**  
707 **colonized with *C. difficile*.** A. Setup of the experimental time line for experiments with 5-day PEG  
708 treated mice consisting of 4 treatment groups. 1. Clindamycin was administered at 10 mg/kg by

709 intraperitoneal injection. 2. 15% PEG 3350 was administered in the drinking water for five days. 3.  
710 5-day PEG plus clindamycin treatment. 4. 5-day PEG plus 10-day recovery treatment. All treatment  
711 groups were then challenged with  $10^5$  *C. difficile* 630 spores. A subset of mice were euthanized  
712 on either 4 or 6 days post-challenge and tissues were collected for histopathology analysis, the  
713 remaining mice were followed through 20 or 30 days post-challenge. B. Weight change from  
714 baseline weight in groups after treatment with PEG and/or clindamycin, followed by *C. difficile*  
715 challenge. C. *C. difficile* CFU/gram stool measured over time via serial dilutions (N = 10-59 mice  
716 per time point). The black line represents the limit of detection for the first serial dilution. CFU  
717 quantification data was not available for each mouse due to stool sampling difficulties (particularly  
718 the day the mice came off of the PEG treatment) or early deaths. For B-C, lines represent the  
719 median for each treatment group and circles represent samples from individual mice. Asterisks  
720 indicate time points where the weight change or CFU/g was significantly different ( $P < 0.05$ )  
721 between groups by the Kruskal-Wallis test with Benjamini-Hochberg correction for testing multiple  
722 time points. The data presented are from a total of 5 separate experiments.

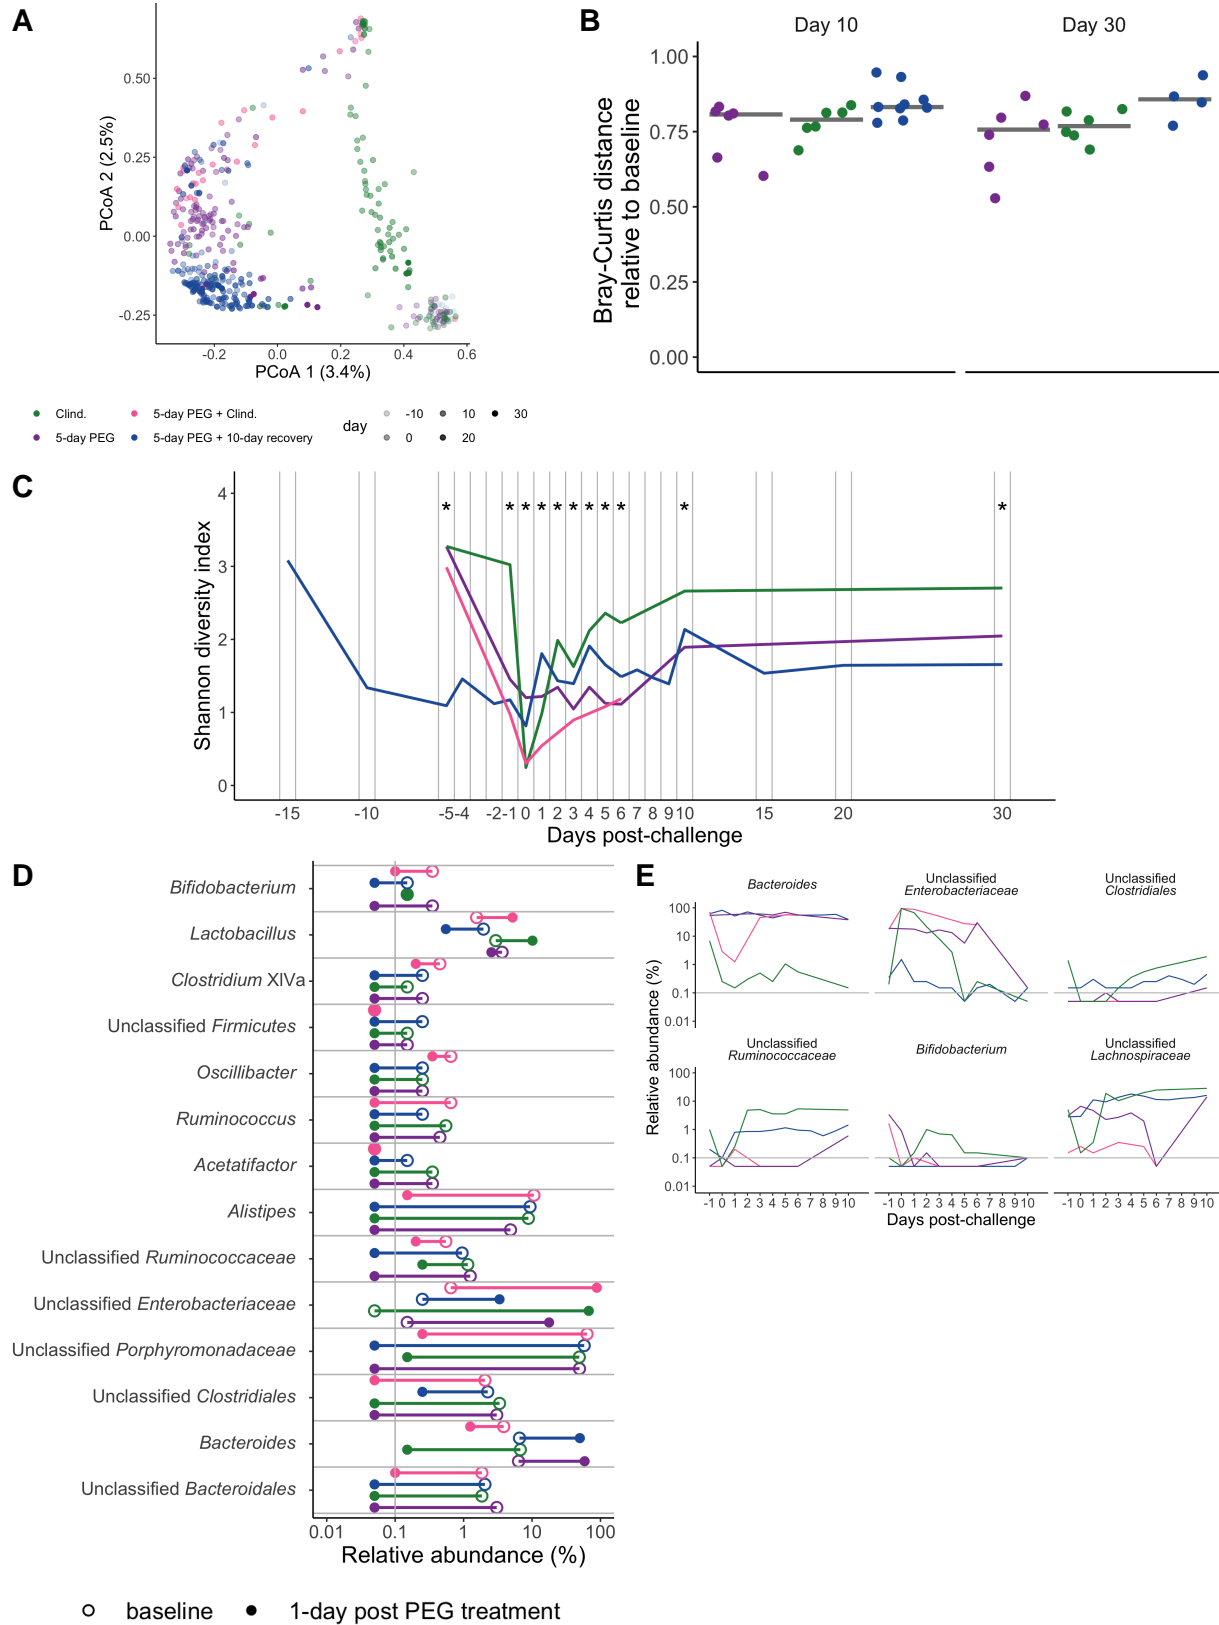

723

724 **Figure 2. 5-day PEG treatment disrupts the stool microbiota for a longer amount of time**



725 **compared to clindamycin-treated mice.** A. Principal Coordinate analysis (PCoA) of Bray-Curtis  
726 distances from stool samples collected throughout the experiment. Each circle represents a  
727 sample from an individual mouse and the transparency of the symbol corresponds to the day  
728 post-challenge. See Data Set S1, sheet 1 for PERMANOVA results. B. Bray-Curtis distances of  
729 stool samples collected on either day 10 or 30 post-challenge relative to the baseline sample  
730 collected for each mouse (before any drug treatments were administered). The symbols represent  
731 samples from individual mice and the line indicates the median value for each treatment group.  
732 C. Shannon diversity in stool communities over time. The line indicates the median value for  
733 each treatment group (Data Set S1, sheet 2). D. 14 of the 33 genera affected by PEG treatment  
734 (Data Set S1, sheet 3). The symbols represent the median relative abundance for a treatment  
735 group at either baseline (open circle) or 1-day post treatment (closed circle). Relative abundance  
736 data from paired baseline and 1-day post treatment stool samples from the 5-day PEG and  
737 5-day PEG plus 10-day recovery groups were analyzed by paired Wilcoxon signed-rank test with  
738 Benjamini-Hochberg correction for testing all identified genera. The clindamycin and 5-day PEG  
739 plus clindamycin treatment groups are shown on the plot for comparison. E. 6 of the 24 genera  
740 that were significantly different between the treatment groups over multiple time points (see Data  
741 Set S1, sheet 4 for complete list). The 5-day PEG plus clindamycin treatment group was only  
742 followed through 6-days post-challenge. Differences between treatment groups were identified by  
743 Kruskal-Wallis test with Benjamini-Hochberg correction for testing all identified genera (\*,  $P < 0.05$ ).  
744 The gray vertical line (D) and horizontal vertical lines (E) indicate the limit of detection.

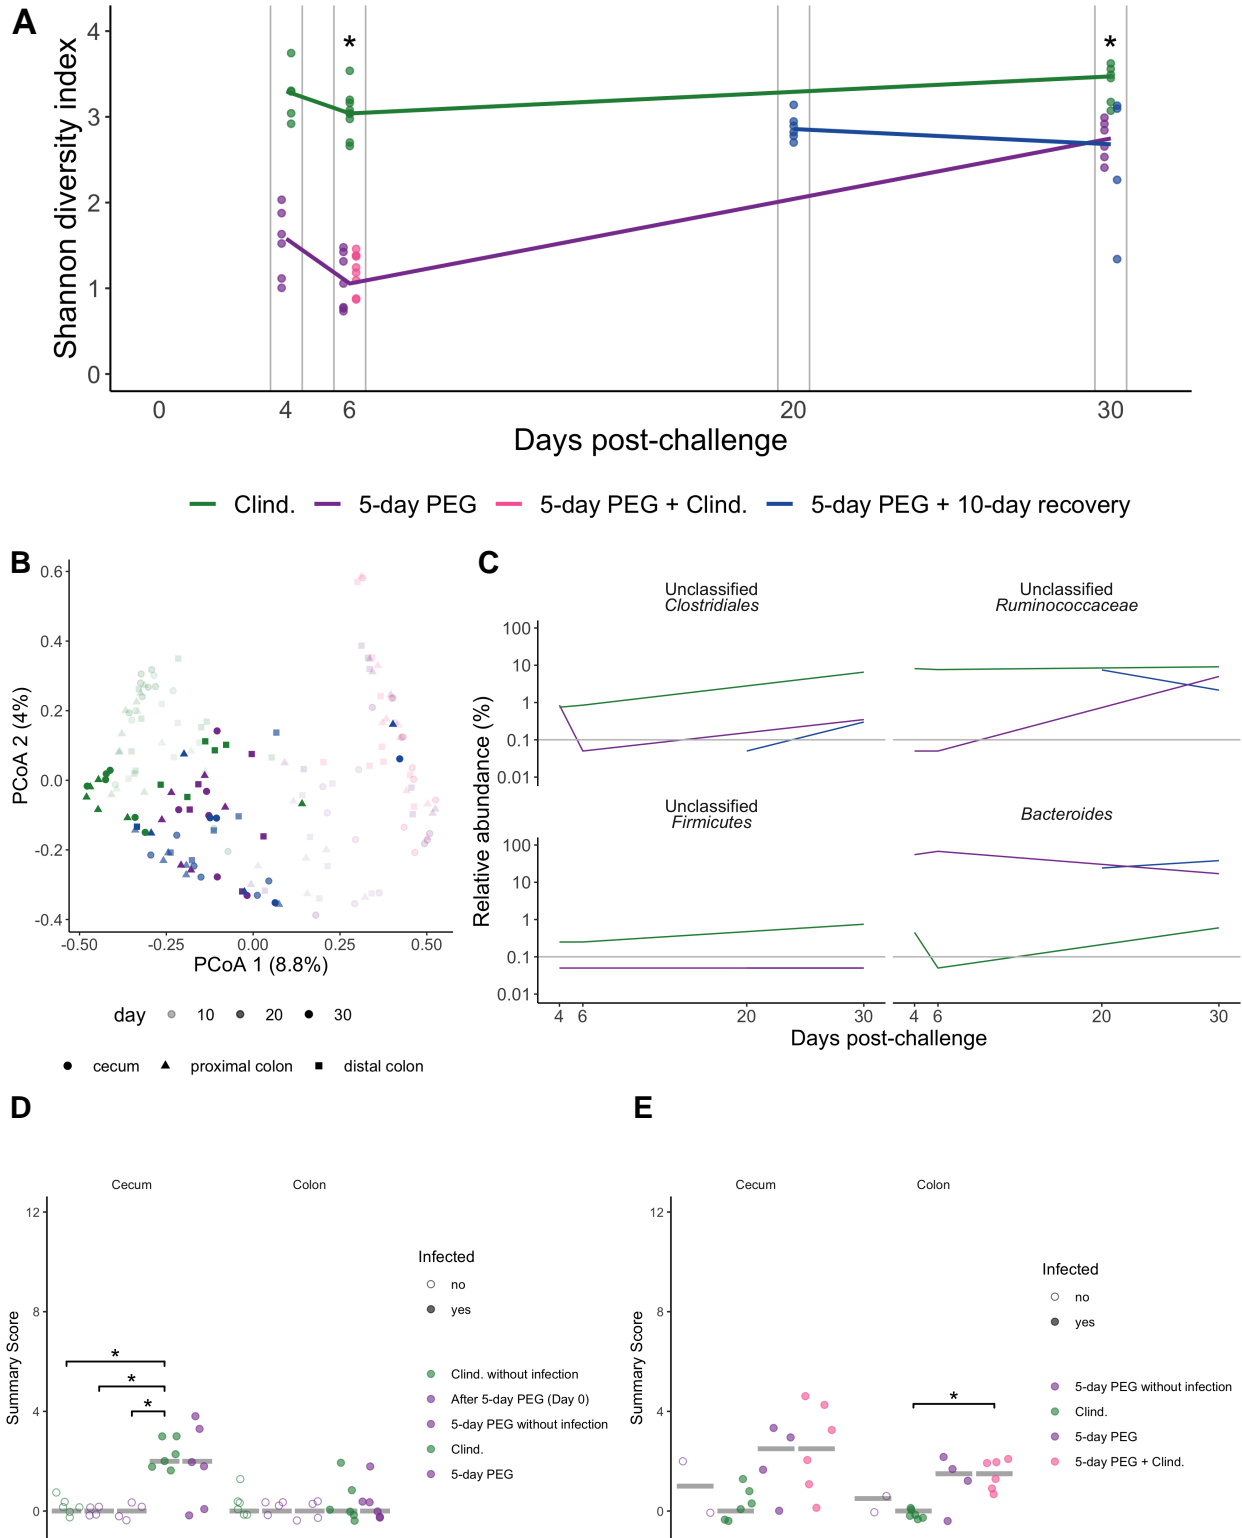

745

746 **Figure 3. 5-day PEG treatment does not result in more severe CDIs, although mucosal**

747 **microbiota is altered.** A. Shannon diversity in cecum communities over time. The colors of the  
748 symbols and lines represent individual and median relative abundance values for four treatment  
749 groups (Data Set S1, sheet 6). B. PCoA of Bray-Curtis distances from mucosal samples collected  
750 throughout the experiment. Circles, triangles, and squares indicate the cecum, proximal colon,  
751 and distal colon communities, respectively. Transparency of the symbol corresponds to the day  
752 post-challenge that the sample was collected. See Data Set S1, sheet 7 for PERMANOVA results.  
753 C. The median relative abundance of the 4 genera that were significantly different between the  
754 cecum communities of different treatment groups on day 6 and day 30 post-challenge (Data Set S1,  
755 sheet 8). The gray vertical lines indicate the limit of detection. D-E. The histopathology summary  
756 scores from cecum and colon H&E stained tissue sections. The summary score is the total score  
757 based on evaluation of edema, cellular infiltration, and inflammation in either the cecum or colon  
758 tissue. Each category is given a score ranging from 0-4, thus the maximum possible summary  
759 score is 12. The tissue for histology was collected at either 4 (D) or 6 (E) days post-challenge  
760 with the exception that one set of 5-day PEG treated mock-challenged mice were collected on  
761 day 0 post-challenge (first set of open purple circles in D). Histology data were analyzed with the  
762 Kruskal-Wallis test followed by pairwise Wilcoxon comparisons with Benjamini-Hochberg correction.  
763 \*,  $P < 0.05$ .

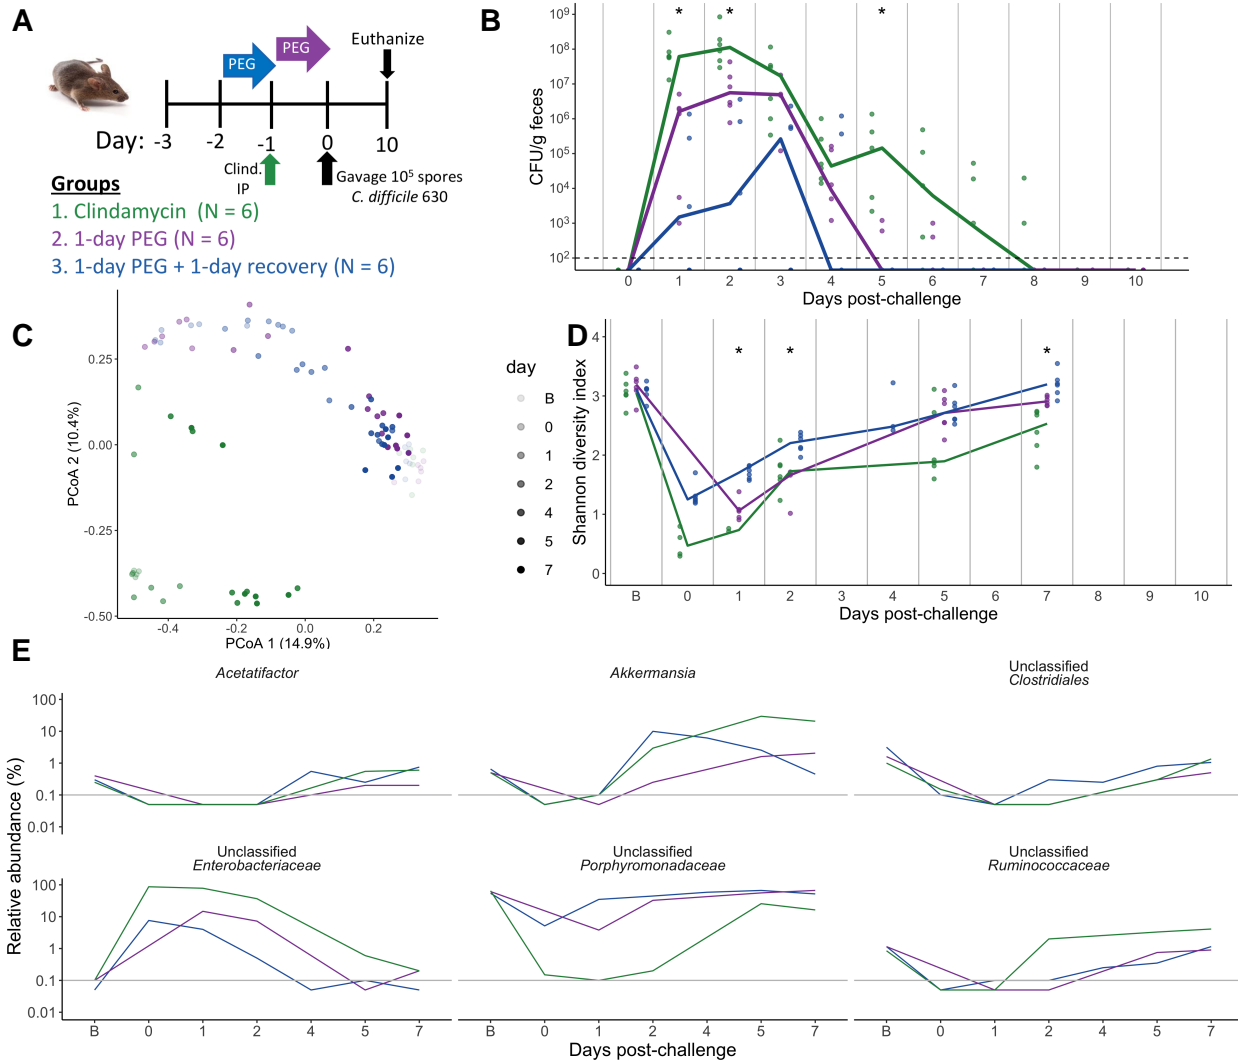

764

765 **Figure 4. 1-day PEG treatment renders mice susceptible to transient *C. difficile***

766 **colonization.** A. Setup of the experimental time line for the 1-day PEG treated mice

767 consisting of 3 treatment groups. 1. Clindamycin was administered at 10 mg/kg by intraperitoneal

768 injection. 2. 15% PEG 3350 was administered in the drinking water for 1 day. 3. 1-day PEG

769 plus 1-day recovery. The three treatment groups were then challenged with  $10^5$  *C. difficile* 630

770 spores. B. *C. difficile* CFU/gram stool measured over time (N = 12-18 mice per time point) by serial

771 dilutions. The black dashed horizontal line represents the limit of detection for the first serial dilution.

772 For B and D, asterisks indicate time points where there was a significant difference ( $P < 0.05$ )

773 between treatment groups by Kruskal-Wallis test with Benjamini-Hochberg correction for testing

774 multiple time points. For B-D, each symbol represents a sample from an individual mouse and

775 lines indicate the median value for each treatment group. C. PCoA of Bray-Curtis distances from  
776 stool communities collected over time (day:  $R^2 = 0.43$ ; group:  $R^2 = 0.19$ , Data Set S1, sheet 11).  
777 Symbol transparency represents the day post-challenge of the experiment. For C-E, the B on the  
778 day legend or days post-challenge X-axis stands for baseline and represents the sample that was  
779 collected prior to any drug treatments. D. Shannon diversity in stool communities over time (Data  
780 Set S1, sheet 12). E. Median relative abundances per treatment group for 6 out of the 14 genera  
781 that were affected by treatment, but recovered close to baseline levels by 7 days post-challenge  
782 (Fig. 3E, Data Set S1, sheets 13 and 14). Paired stool sample relative abundance values either  
783 baseline and day 1 or baseline and day 7 were analyzed by paired Wilcoxon signed-rank test with  
784 Benjamini-Hochberg correction for testing all identified genera. Only genera that were different  
785 between baseline and 1-day post-challenge, but not baseline and 7-days post-challenge are shown.  
786 The gray horizontal lines represents the limit of detection.

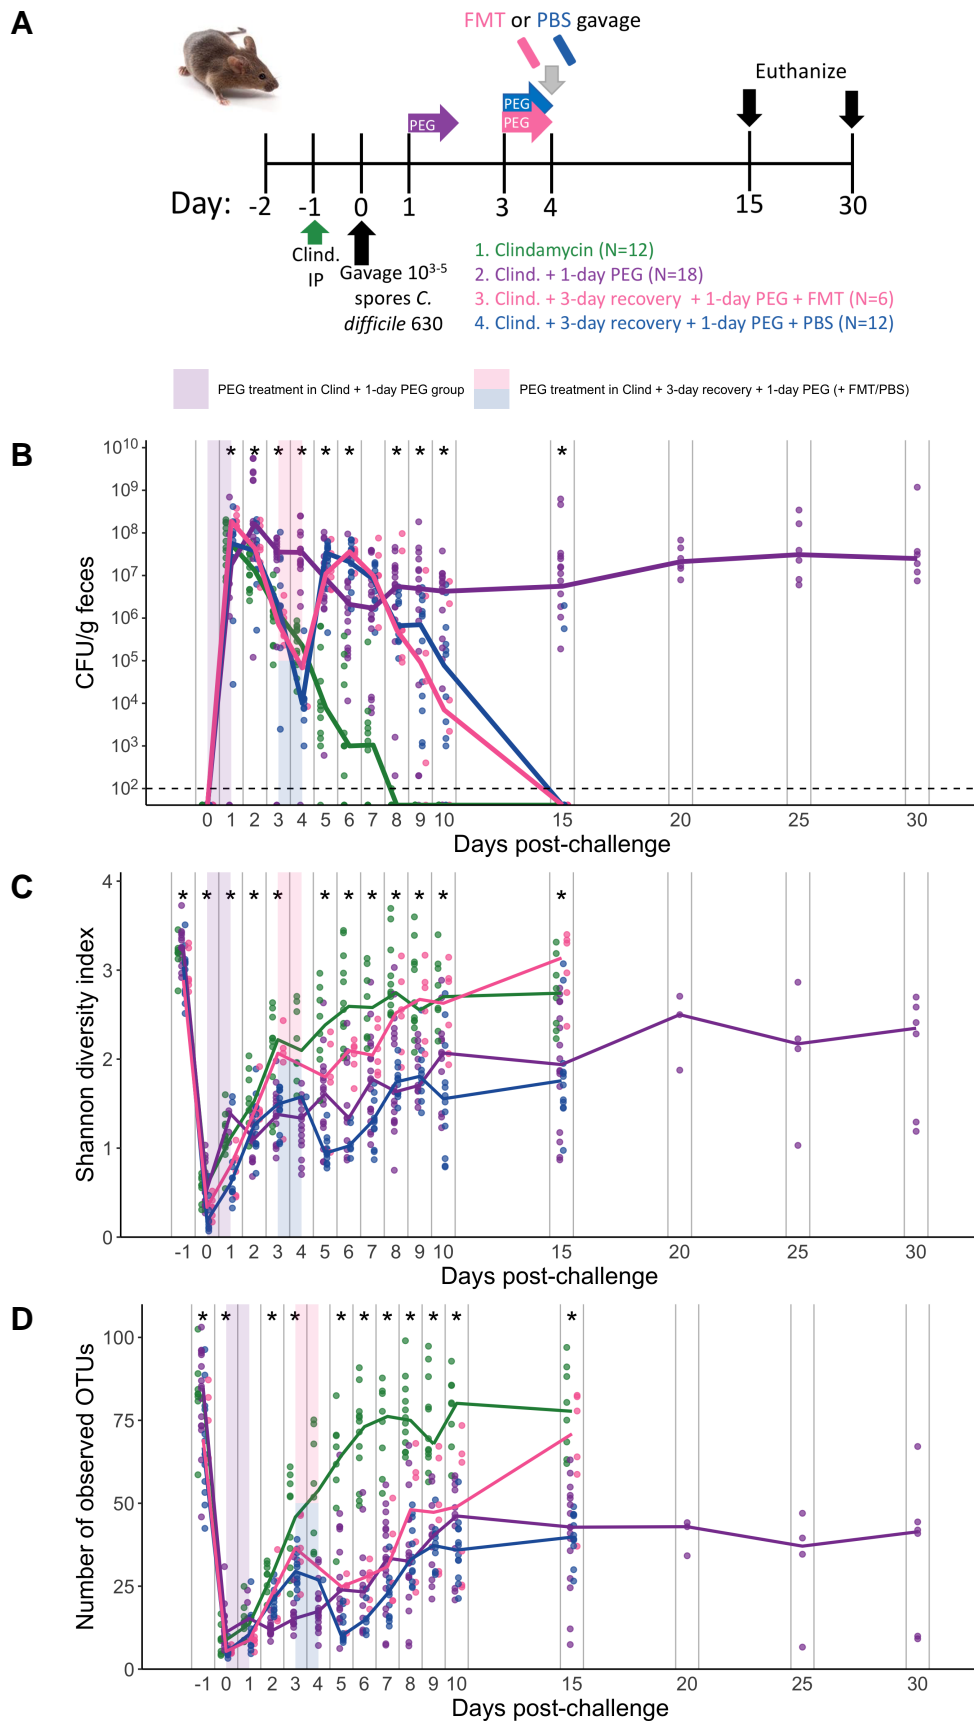

Figure 5.

788 **1-day PEG treatment post *C. difficile* challenge prolongs colonization regardless of**  
789 **whether an FMT is also administered.** A. Setup of the experimental time line for experiments  
790 with post-challenge PEG treated mice. There were a total of 4 different treatment groups. All mice  
791 were administered 10 mg/kg clindamycin intraperitoneally (IP) 1 day before challenge with  $10^{3-5}$   
792 *C. difficile* 630 spores. 1. Received no additional treatment (Clindamycin). 2. Immediately after  
793 *C. difficile* challenge, mice received 15% PEG 3350 in the drinking water for 1 day. 3-4. 3-days  
794 after challenge, mice received 1-day PEG treatment and then received either 100 microliters a  
795 fecal microbiota transplant (3) or PBS (4) solution by oral gavage. Mice were followed through  
796 15-30 days post-challenge (only the post-CDI 1-day PEG group was followed through 30 days  
797 post-challenge). B. CFU/g of *C. difficile* stool measured over time via serial dilutions. The black line  
798 represents the limit of detection for the first serial dilution. C-D. Shannon diversity (C) and richness  
799 (D) in stool communities over time (Data Set S1, sheets 15 and 16). B-D. Each symbol represents  
800 a stool sample from an individual mouse with the lines representing the median value for each  
801 treatment group. Asterisks indicate time points with significant differences ( $P < 0.05$ ) between  
802 groups by the Kruskal-Wallis test with a Benjamini-Hochberg correction for testing multiple times  
803 points. Colored rectangles indicates the 1-day PEG treatment period for applicable groups. The  
804 data presented are from a total of 3 separate experiments.

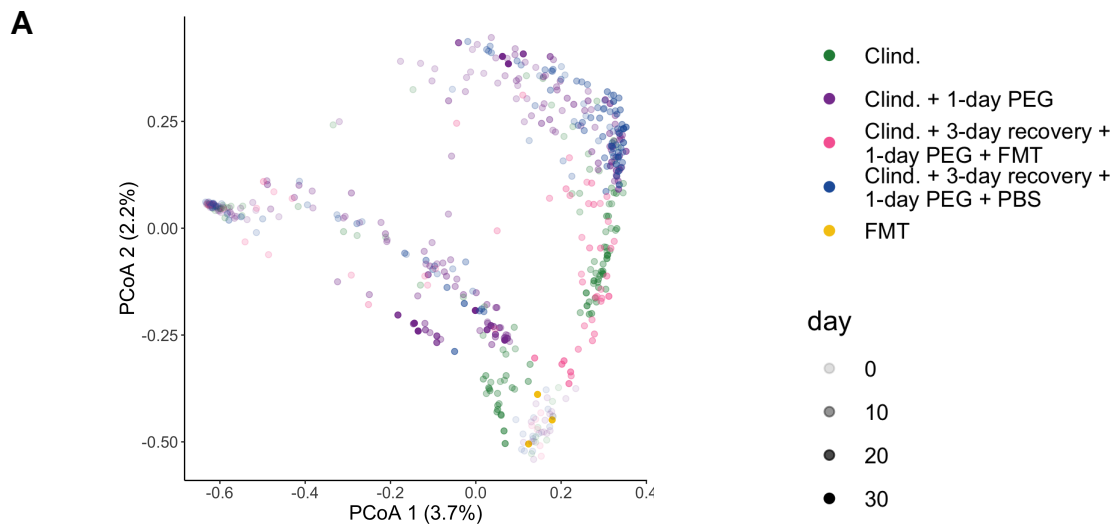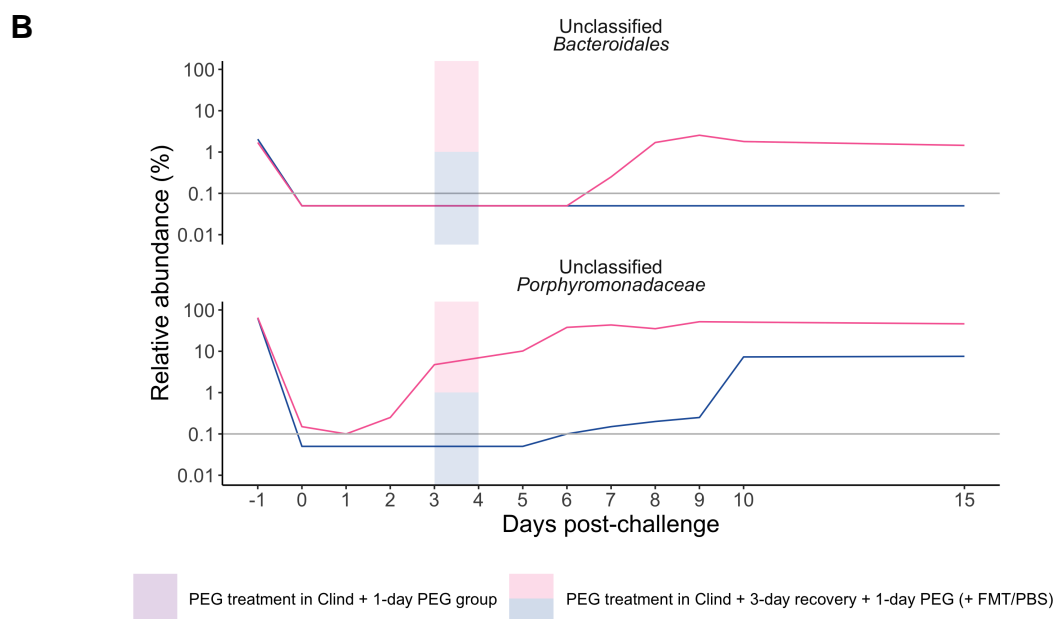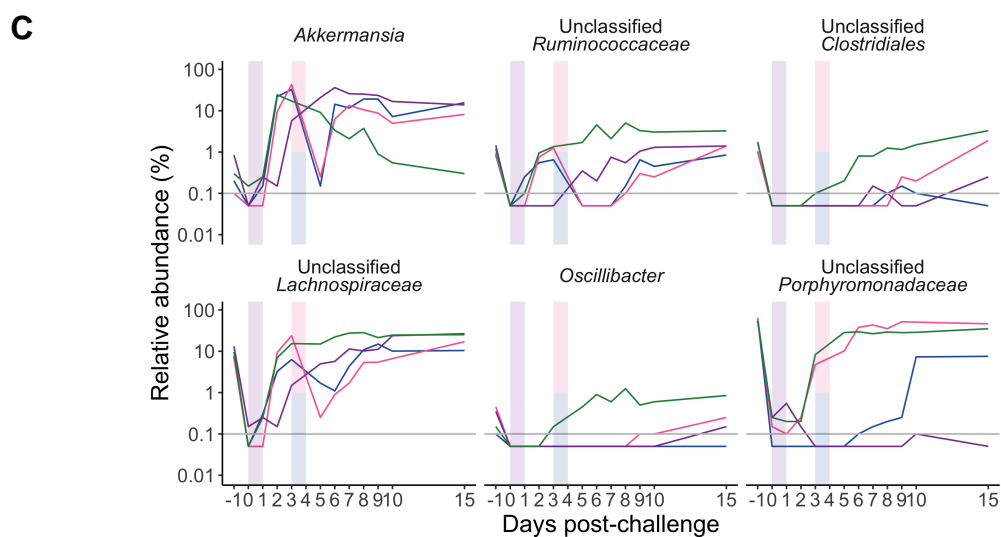

805

Figure



806 **6. For 1-day PEG treatment post *C. difficile* challenge mice that also receive an FMT only**  
807 **some bacterial genera were restored.** A. PCoA of Bray-Curtis distances from stool samples  
808 collected over time as well as the FMT solution that was administered to one of the treatment  
809 groups. Each circle represents an individual sample, the transparency of the circle corresponds  
810 to day post-challenge. See Data Set S1, sheet 17 for PERMANOVA results. B. Median relative  
811 abundances of 2 genera that were significantly different over multiple time points in mice that were  
812 administered either FMT or PBS solution via gavage C. Median relative abundances of the top 6  
813 out of 24 genera that were significant over multiple time points, plotted over time (see Data Set S1,  
814 sheet 18 for complete list). For B-C, colored rectangles indicates the 1-day PEG treatment period  
815 for applicable groups. Gray horizontal lines represent the limit of detection. Differences between  
816 treatment groups were identified by Kruskal-Wallis test with Benjamini-Hochberg correction for  
817 testing all identified genera. For pairwise comparisons of the groups (B), we performed pairwise  
818 Wilcoxon comparisons with Benjamini-Hochberg correction for testing all combinations of group  
819 pairs.

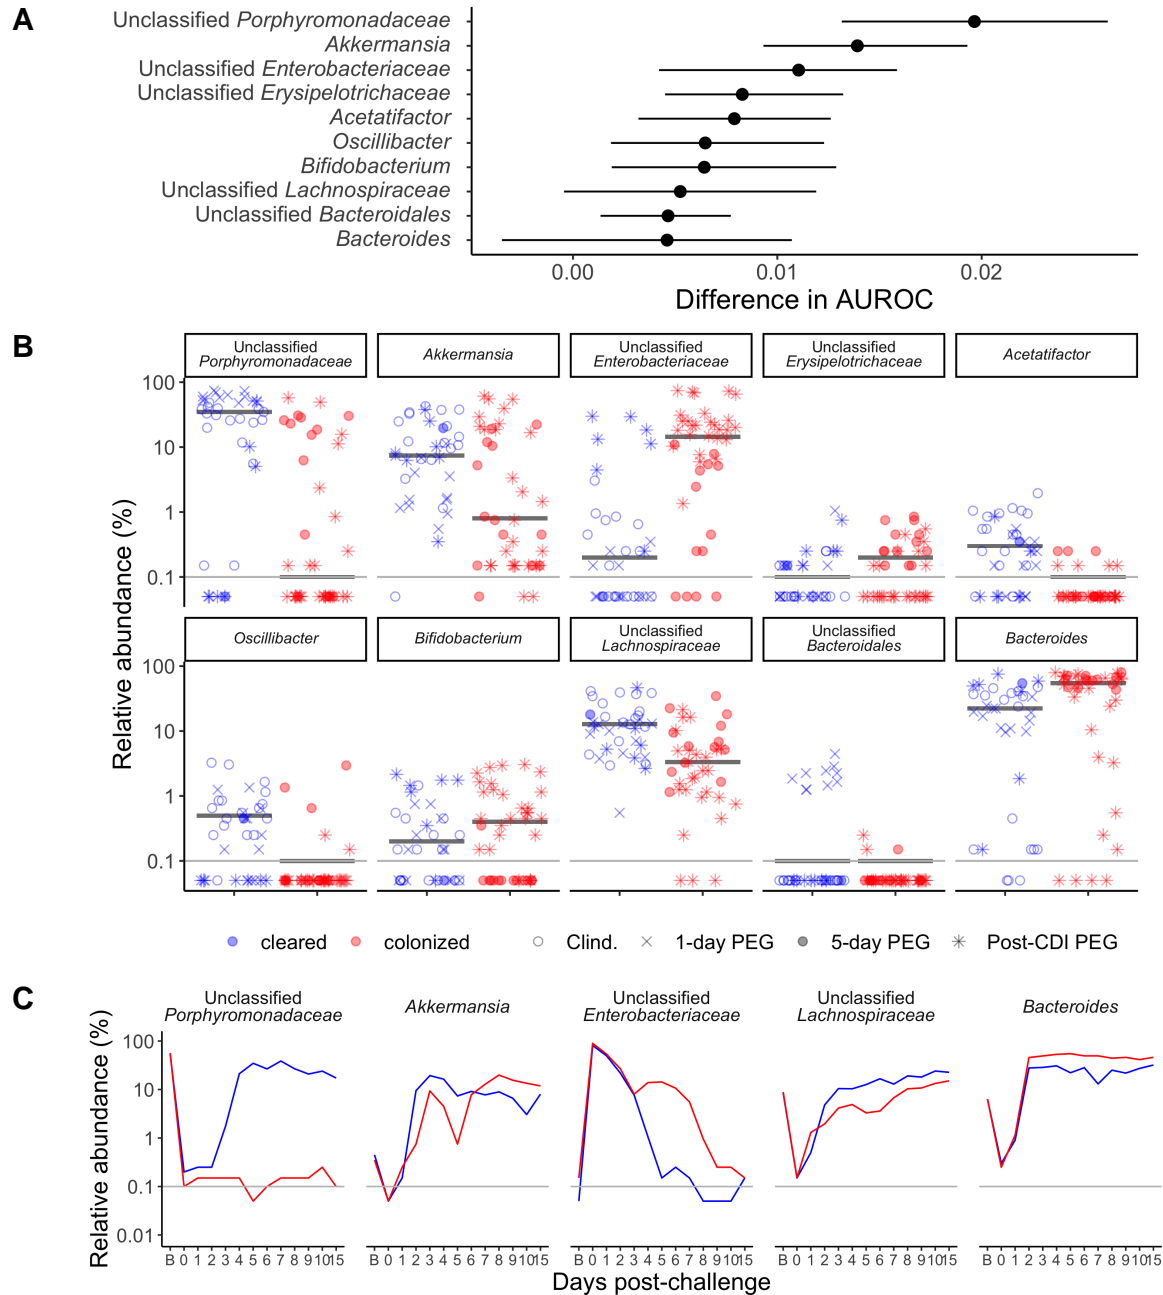

820

821 **Figure 7. Specific microbiota features associated with prolonged *C. difficile* colonization**  
 822 **in PEG treated mice.** A. Top ten bacteria that contributed to the random forest model trained on  
 823 5-day post-challenge community relative abundance data, predicting whether mice would still be  
 824 colonized with *C. difficile* 10 days post-challenge. The median (point) and interquartile range (lines)  
 825 change in AUROC when the bacteria were left out of the model by permutation feature importance  
 826 analysis. B. The median relative abundances of the top ten bacteria that contributed to the random  
 827 forest classification model at 5 days post-challenge. Red indicates the mice were still colonized

828 with *C. difficile* while blue indicates mice that cleared *C. difficile* 10 days post-challenge and the  
829 black horizontal line represents the median relative abundance for the two categories. Each symbol  
830 represents a stool sample from an individual mouse and the shape of the symbol indicates whether  
831 the PEG-treated mice received a 5-day (Fig. 1-3), 1-day (Fig. 4) or post-challenge PEG (Fig. 5-6)  
832 treatment. C. The median relative abundances of the 5 genera with greater than 1% median  
833 relative abundance in the stool community over time. For B-C, the gray horizontal lines represents  
834 the limit of detection.

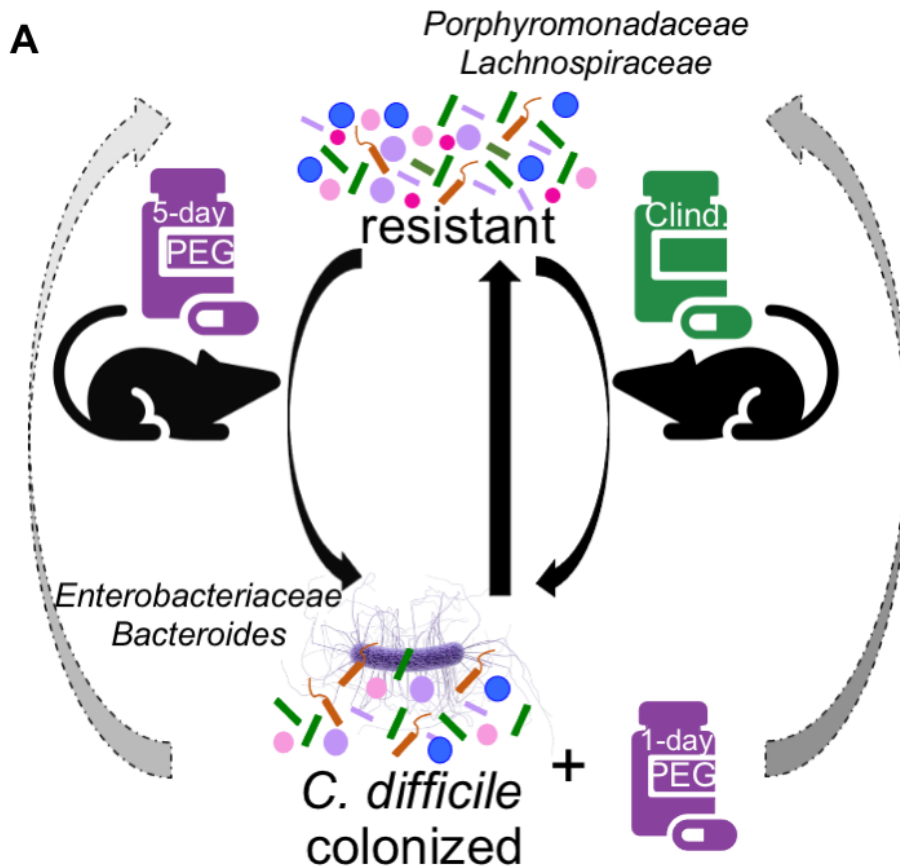

835

836 **Figure 8. Schematic summarizing findings.** The gut microbiota of our C57Bl/6 mice is resistant  
837 to *C. difficile* but treatment with either the antibiotic, clindamycin, or the osmotic laxative, PEG  
838 3350, renders the mice susceptible to *C. difficile* colonization. Recovery of colonization resistance  
839 in clindamycin-treated mice is relatively straightforward and the mice clear *C. difficile* within 10  
840 days post-challenge. However, for mice that received either a 5-day PEG treatment prior to *C.*  
841 *difficile* challenge or a 1-day PEG treatment post-challenge recovery of colonization resistance was  
842 delayed because most mice were still colonized with *C. difficile* 10 days post-challenge. We found  
843 increased relative abundances of *Porphyromonadaceae* and *Lachnospiraceae* were associated  
844 with recovery of colonization resistance, while increased relative abundances of *Enterobacteriaceae*  
845 and *Bacteroides* were associated with prolonged *C. difficile* colonization.

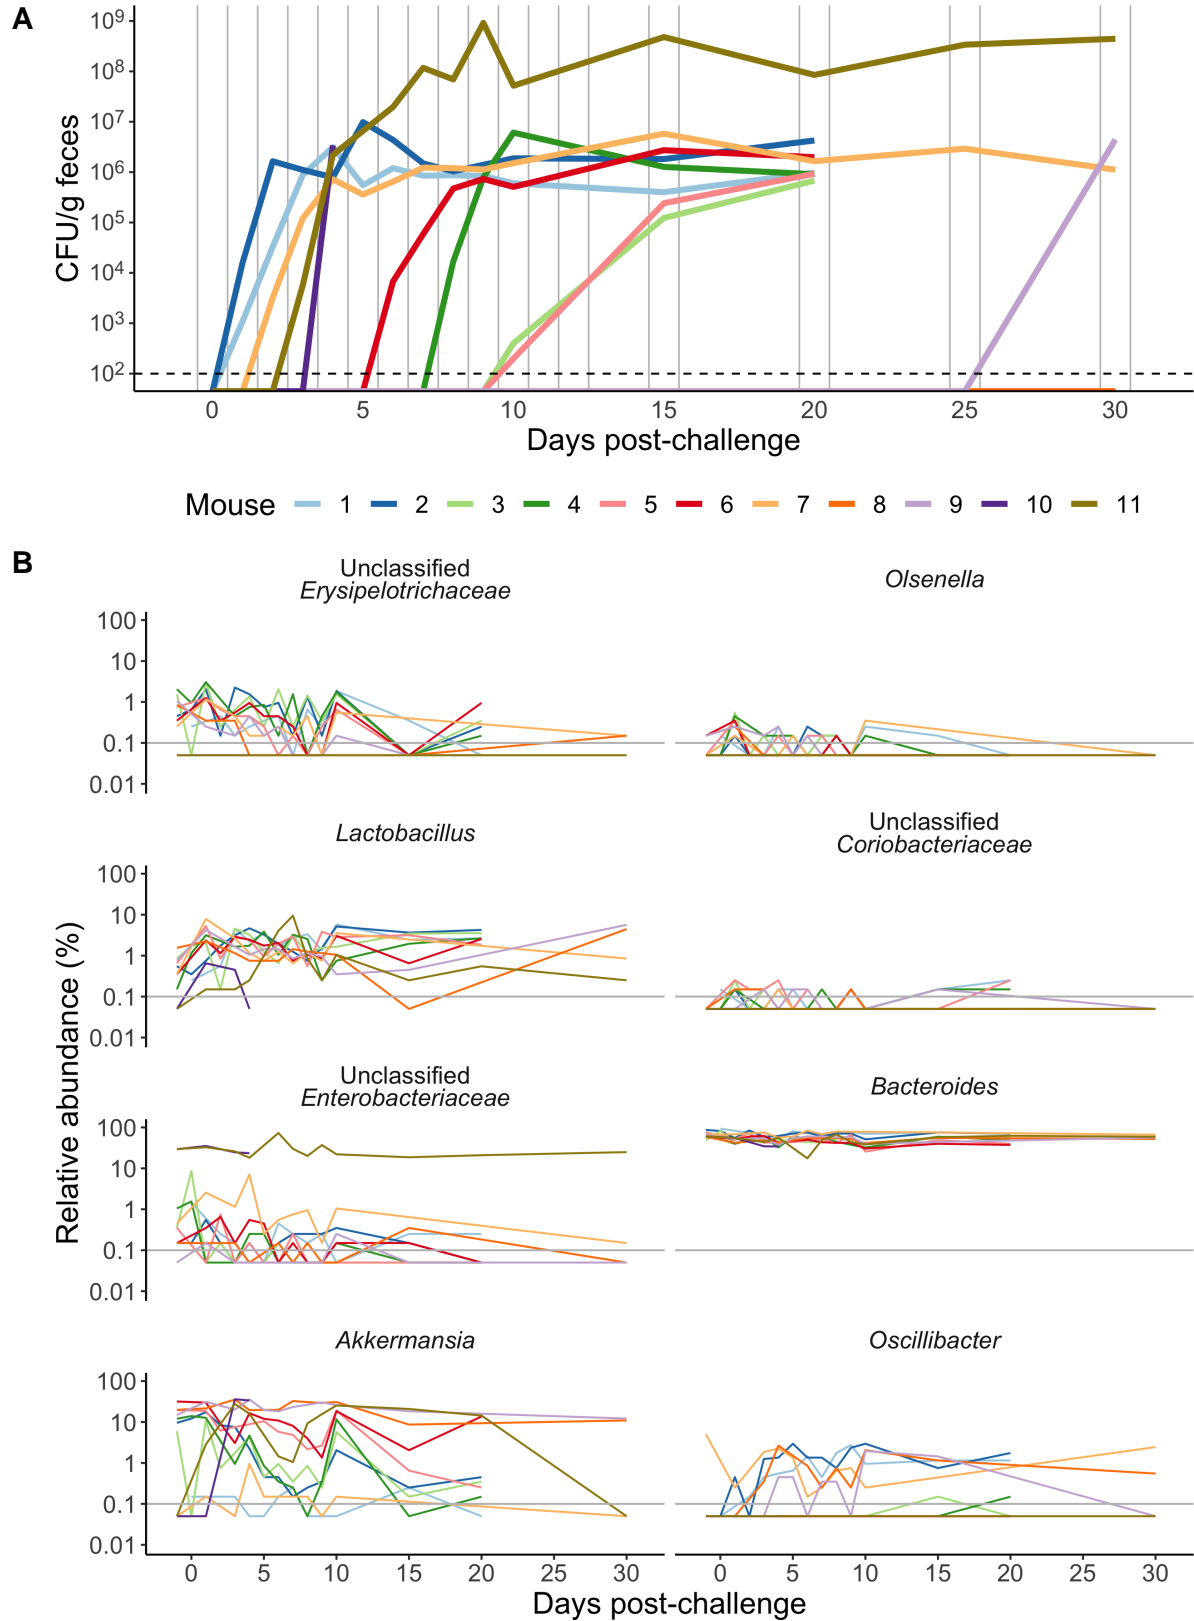

846

847 **Figure S1. Microbiota dynamics post-challenge in the 5-day PEG treatment plus 10-day**

848 **recovery mice.** A. *C. difficile* CFU/g over time in the stool samples collected from 5-day PEG  
849 treated mice that were allowed to recover for 10 days prior to challenge. Same data presented in  
850 Fig. 1C, but the data for the other 3 treatment groups have been removed and each line represents  
851 the CFU over time for an individual mouse. Mouse 10 was found dead 6 days post-challenge.  
852 B. Relative abundances of eight bacterial genera from day 0 post-challenge onward in each of  
853 the 10-day recovery mice. We analyzed samples from day 0 and day 8 post-challenge, which  
854 represented the time points where mice were challenged with *C. difficile* and when the median  
855 relative *C. difficile* CFU stabilized for the group using the paired Wilcoxon signed-rank test, but no  
856 genera were significantly different after Benjamini-Hochberg correction (Data Set S1, sheet 5).

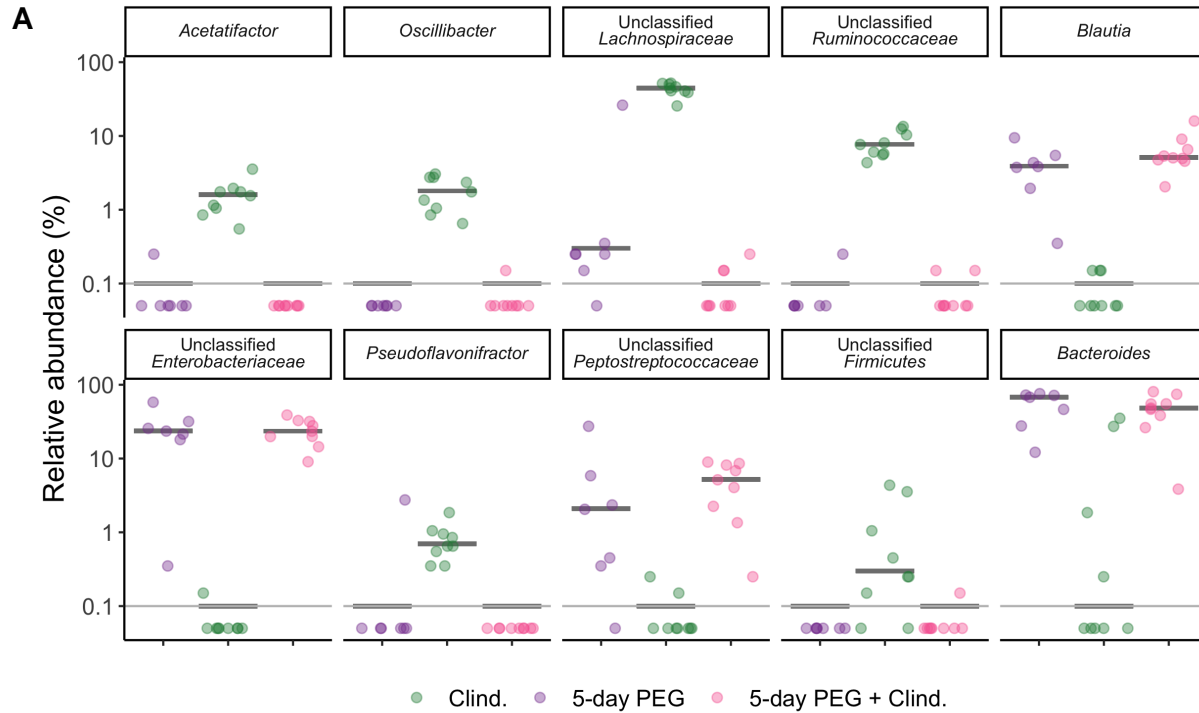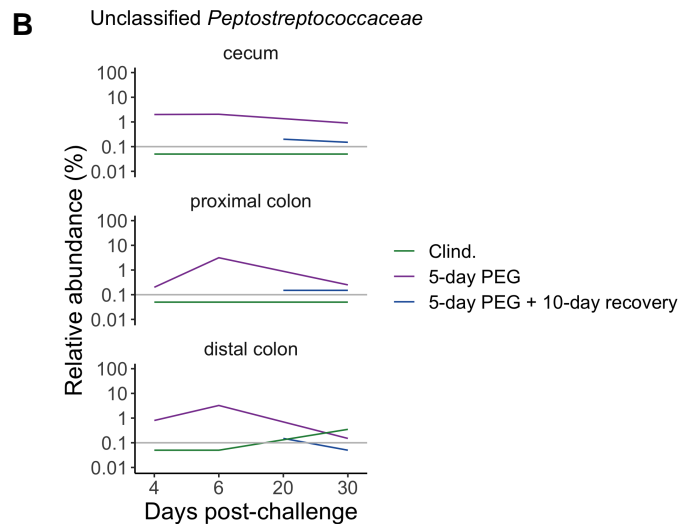

857

858 **Figure S2. PEG treatment still has a large impact on the mucosal microbiota 6 days**  
 859 **post-challenge** A. The relative abundances of the 10 bacterial genera that were significantly  
 860 different between treatment groups at 6 days post-infection in the cecum tissue (the relative  
 861 abundances of the 10 genera were also significantly different in the proximal and distal colon  
 862 tissues, Data Set S1, sheets 8, 9, and 10). Each symbol represents a tissue sample from an  
 863 individual mouse, the black horizontal lines represents the median relative abundances for each  
 864 treatment group. B. The relative abundance of *Peptostreptococcaceae* in the three types of tissue

865 sample communities over time. For A-B, the gray horizontal lines represent the limit of detection.



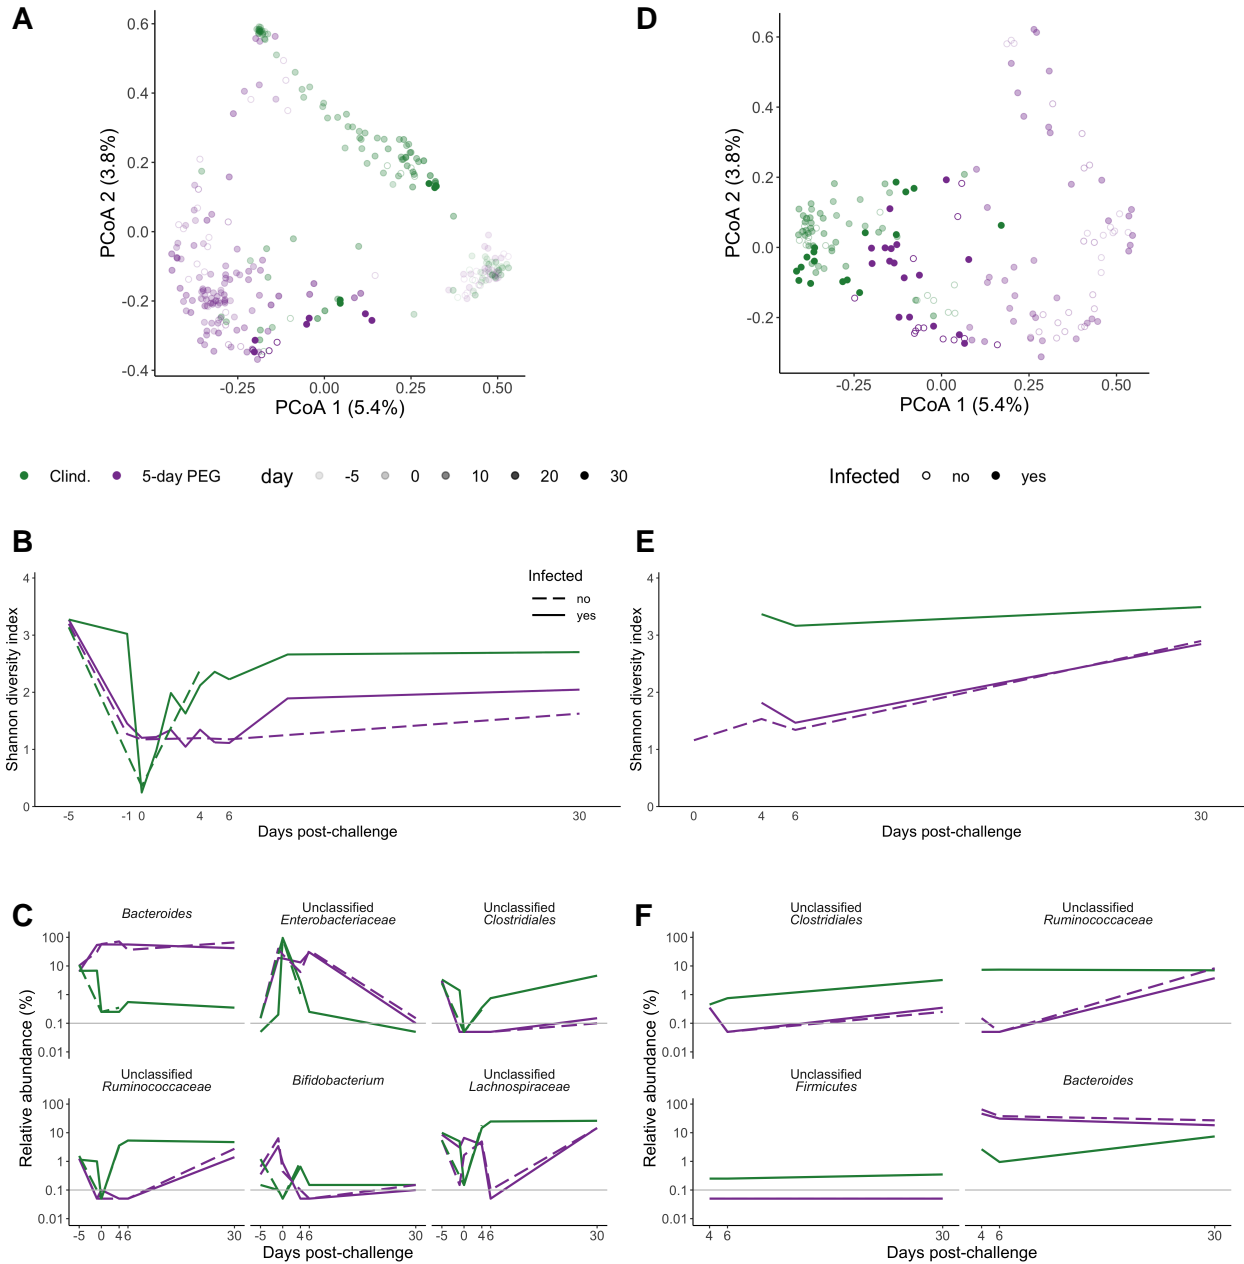

866

867 **Figure S3. *C. difficile* challenge does not enhance the disruptive effect of PEG on the**  
 868 **microbiota.** A, D. PCoAs of the Bray-Curtis distances from the stool (A) and tissue (D) communities  
 869 from mock- and *C. difficile*-challenged treatment groups. Each symbol represents a sample from an  
 870 individual mouse with open and closed circles representing mock and *C. difficile*-challenged mice,  
 871 respectively. B, E. Median Shannon diversity in stool (B) and tissue (E) communities collected over  
 872 time. C, F. The median relative abundances of genera that were significantly different between  
 873 the *C. difficile* challenged treatment groups in either the stool (Fig. 2E) or cecum tissue (Fig. 3C)

874 communities in the stool (C) and tissue (F) communities from mock- and *C. difficile*-challenged mice.  
875 For B-F, the dashed and solid lines represent the median value for mock and *C. difficile*-challenged  
876 mice, respectively. For E-F, tissues from mock-challenged clindamycin treated mice were only  
877 collected 4 days post-challenge so there is no dashed line for this group.

878 **Data Set S1**

879 **Data Set S1, Sheets 1-19. Excel workbook with 19 sheets.**

880 **Data Set S1, Sheet 1. PERMANOVA results for the stool communities from mice in the 5-day**  
881 **PEG subset.**

882 **Data Set S1, Sheet 2. Shannon diversity analysis for the stool communities from mice in**  
883 **the 5-day PEG subset.**

884 **Data Set S1, Sheet 3. Genera with relative abundances impacted by PEG treatment based**  
885 **on stool communities of 5-day PEG treated mice.**

886 **Data Set S1, Sheet 4. Genera with relative abundances that vary between treatment groups**  
887 **in the stool communities from mice in the 5-day PEG subset.**

888 **Data Set S1, Sheet 5. Statistical analysis results for genera with relative abundances that**  
889 **varied in stool communities in the 5-day PEG plus 10-day recovery mice between the day 1**  
890 **and day 8 time points.**

891 **Data Set S1, Sheet 6. Shannon diversity analysis for the cecum communities from mice in**  
892 **the 5-day PEG experiments.**

893 **Data Set S1, Sheet 7. PERMANOVA results for the tissue communities from mice in the**  
894 **5-day PEG subset.**

895 **Data Set S1, Sheet 8. Genera with relative abundances that vary between treatment groups**  
896 **in the cecum communities from mice in the 5-day PEG subset.**

897 **Data Set S1, Sheet 9. Genera with relative abundances that vary between treatment groups**  
898 **in the proximal colon communities from mice in the 5-day PEG subset.**

899 **Data Set S1, Sheet 10. Genera with relative abundances that vary between treatment groups**  
900 **in the distal colon communities from mice in the set of 5-day PEG subset.**

901 **Data Set S1, Sheet 11. PERMANOVA results for the stool communities from mice in the set**

902 **of 1-day PEG subset.**

903 **Data Set S1, Sheet 12. Shannon diversity analysis for the stool communities from mice in**  
904 **the 1-day PEG experiments.**

905 **Data Set S1, Sheet 13. Genera with different relative abundances between the baseline and**  
906 **day 1 time points in the 1-day PEG subset.**

907 **Data Set S1, Sheet 14. Genera with different relative abundances between the baseline and**  
908 **day 7 time points in the 1-day PEG subset..**

909 **Data Set S1, Sheet 15. Shannon diversity analysis for the stool communities from mice in**  
910 **the post-challenge PEG experiments.**

911 **Data Set S1, Sheet 16. Richness analysis for the stool communities from mice in the**  
912 **post-challenge PEG experiments.**

913 **Data Set S1, Sheet 17. PERMANOVA results for the stool communities from mice in the**  
914 **post-challenge PEG subset.**

915 **Data Set S1, Sheet 18. Genera with relative abundances that vary between treatment groups**  
916 **in the stool communities from mice in the post-challenge PEG subset.**

917 **Data Set S1, Sheet 19. AUROC results for the 100 different seeds from each of the 3 models**  
918 **tested.**
